# Supplementary material for: Variant-to-Gene-Mapping Analyses Reveal a Role for the Hypothalamus in Genetic Susceptibility to Inflammatory Bowel Disease
Source: PubMed Central journal article supplement — Cell Mol Gastroenterol Hepatol. 2020 Oct 16;11(3):667–82. doi: 10.1016/j.jcmgh.2020.10.004 (PMC7843407; doi:10.1016/j.jcmgh.2020.10.004), 2020-10-16
Supplement: mmc1.pdf [file mmc1.pdf]

**Supplementary Table 1. Genes implicated by IBDs SNPs-promoters interactions in hypothalamic-like neurons**

| PROXY_SNP  | SNP_LOC         | SENTINEL_SNP | R2       | GWAS_LOCUS | FRAG_RES | GENES                             |
|------------|-----------------|--------------|----------|------------|----------|-----------------------------------|
| rs11230563 | chr11:60776209  | rs11230563   |          | 1 MS4A15   |          | 4                                 |
| rs11230563 | chr11:60776209  | rs11230563   |          | 1 MS4A15   |          | 4 TCONS_00019908 TCONS_00019310   |
| rs72743461 | chr15:67441750  | rs17293632   |          | 1 IQCH     |          | 4                                 |
| rs72743461 | chr15:67441750  | rs17293632   |          | 1 IQCH     |          | 4                                 |
| rs17293632 | chr15:67442596  | rs17293632   |          | 1 IQCH     |          | 4                                 |
| rs17293632 | chr15:67442596  | rs17293632   |          | 1 IQCH     |          | 4                                 |
| rs11742570 | chr5:40410584   | rs7711427    |          | 1 TTC33    |          | 4 TCONS_00009928                  |
| rs12761675 | chr10:35438337  | rs34779708   | 0.995697 | CCNY       |          | 4                                 |
| rs12761675 | chr10:35438337  | rs34779708   | 0.995697 | CCNY       |          | 4 CREM                            |
| rs61889537 | chr11:58395627  | rs11229555   | 0.994726 | OR5B3      |          | 4                                 |
| rs61889537 | chr11:58395627  | rs11229555   | 0.994726 | OR5B3      |          | 4 CNTF                            |
| rs61889537 | chr11:58395627  | rs11229555   | 0.994726 |            | 28       | 1 CNTF                            |
| rs61889537 | chr11:58395627  | rs11229555   | 0.994726 | OR5B3      |          | 4 AP001258.4 FAM111A              |
| rs230522   | chr4:103462797  | rs3774937    | 0.991167 | TACR3      |          | 4 SLC9B2                          |
| rs118882   | chr4:103463007  | rs3774937    | 0.991167 | TACR3      |          | 4 SLC9B2                          |
| rs76768758 | chr8:49177322   | rs7011507    | 0.990937 | C8orf22    |          | 4 SNAI2                           |
| rs67111717 | chr5:176790162  | rs4976646    | 0.986912 | UNC5A      |          | 4 LMAN2                           |
| rs67111717 | chr5:176790162  | rs4976646    | 0.986912 |            | 221      | 1                                 |
| rs67111717 | chr5:176790162  | rs4976646    | 0.986912 | UNC5A      |          | 4                                 |
| rs67111717 | chr5:176790162  | rs4976646    | 0.986912 | UNC5A      |          | 4 PRR7 PRR7-AS1                   |
| rs67111717 | chr5:176790162  | rs4976646    | 0.986912 | UNC5A      |          | 4 PRR7 PRR7-AS1                   |
| rs62361398 | chr5:72529325   | rs10061469   | 0.986594 | ZNF366     |          | 4 FOXD1                           |
| rs6568423  | chr6:106442096  | rs7746082    | 0.985597 | CRYBG1     |          | 4 PRDM1                           |
| rs9557195  | chr13:99956622  | rs3742130    | 0.982945 |            | 180      | 1 UBAC2 GPR183                    |
| rs4626115  | chr3:18772770   | rs73178598   | 0.97426  | KCNH8      |          | 4                                 |
| rs4626115  | chr3:18772770   | rs73178598   | 0.97426  |            | 287      | 1                                 |
| rs73069539 | chr7:26903661   | rs3801810    | 0.971376 |            | 186      | 1 SKAP2                           |
| rs73069539 | chr7:26903661   | rs3801810    | 0.971376 |            | 186      | 1                                 |
| rs6062510  | chr20:62372148  | rs6062504    | 0.961669 | LAMA5      |          | 4 TPD52L2                         |
| rs2857656  | chr17:32582007  | rs9889296    | 0.959529 |            | 331      | 1                                 |
| rs4809221  | chr20:62372706  | rs6062504    | 0.956937 | LAMA5      |          | 4 TPD52L2                         |
| rs11679791 | chr2:234156536  | rs6752107    | 0.949251 |            | 265      | 1 ATG16L1                         |
| rs5870     | chr10:104239100 | rs3740415    | 0.928603 | CFAP43     |          | 4 NFKB2                           |
| rs202657   | chr22:41844786  | rs727563     | 0.917883 | SREBF2     |          | 4 ACO2 PHF5A                      |
| rs16841912 | chr1:197702476  | rs2488389    | 0.912864 | DENND1B    |          | 1 DENND1B                         |
| rs106860   | chr22:41840407  | rs727563     | 0.912708 |            | 282      | 1 ACO2 PHF5A                      |
| rs106860   | chr22:41840407  | rs727563     | 0.912708 | SREBF2     |          | 4 ACO2 PHF5A                      |
| rs12654812 | chr5:176794191  | rs4976646    | 0.906051 |            | 221      | 1                                 |
| rs12654812 | chr5:176794191  | rs4976646    | 0.906051 | UNC5A      |          | 4 PRR7 PRR7-AS1                   |
| rs3811699  | chr3:49396360   | rs3197999    | 0.875274 |            | 166      | 1 TCTA RHOA                       |
| rs12337739 | chr9:117670664  | rs4979473    | 0.870424 | TLR4       |          | 4                                 |
| rs12337739 | chr9:117670664  | rs4979473    | 0.870424 | TLR4       |          | 4 RP11-402G3.5 TCONS_00016858     |
| rs12337739 | chr9:117670664  | rs4979473    | 0.870424 |            | 222      | 1 RP11-402G3.5 TCONS_00016858     |
| rs12337739 | chr9:117670664  | rs4979473    | 0.870424 | TLR4       |          | 4                                 |
| rs12337739 | chr9:117670664  | rs4979473    | 0.870424 | TLR4       |          | 4                                 |
| rs2069776  | chr4:123371976  | rs7657746    | 0.835903 |            | 299      | 1                                 |
| rs2941522  | chr17:37910368  | rs12946510   | 0.829413 | TBC1D3K    |          | 4                                 |
| rs2941522  | chr17:37910368  | rs12946510   | 0.829413 | TBC1D3K    |          | 4 STARD3                          |
| rs212838   | chr7:26698194   | rs3801810    | 0.82282  | SKAP2      |          | 4 CBX3 HNRNPA2B1                  |
| rs212838   | chr7:26698194   | rs3801810    | 0.82282  | SKAP2      |          | 4                                 |
| rs212838   | chr7:26698194   | rs3801810    | 0.82282  | SKAP2      |          | 4                                 |
| rs212838   | chr7:26698194   | rs3801810    | 0.82282  | SKAP2      |          | 4 AC004540.5 TCONS_I2_00027077 TC |
| rs212838   | chr7:26698194   | rs3801810    | 0.82282  | SKAP2      |          | 4 ONS_I2_00025728 TCONS_I2_00025  |
| rs212838   | chr7:26698194   | rs3801810    | 0.82282  | SKAP2      |          | 4                                 |
| rs11564258 | chr12:40792300  | rs148319899  | 0.822739 |            | 80       | 1                                 |
| rs7191618  | chr16:28565667  | rs26528      | 0.818268 | IL27       |          | 4                                 |
| rs10267797 | chr7:107515300  | rs4380874    | 0.805257 | COG5       |          | 4 GPR22                           |
| rs10267797 | chr7:107515300  | rs4380874    | 0.805257 |            | 200      | 1 GPR22                           |

**Supplementary table 2. GTEx average gene expression in transcript per million (TPM) for genes implicated in hypothalamic-like neurons**

| <b>gene</b> | <b>hypothalamus</b> |
|-------------|---------------------|
| CREM        | 9.82                |
| ACO2        | 66.83               |
| ATG16L1     | 10.57               |
| CBX3        | 38.27               |
| CNTF        | 1.028               |
| DENND1B     | 1.4                 |
| FAM111A     | 3.52                |
| FOXD1       | 1.37                |
| GPR183      | 4.17                |
| GPR22       | 1.44                |
| HNRNPA2B1   | 230.4               |
| LMAN2       | 34.01               |
| NFKB2       | 3.65                |
| PHF5A       | 21.12               |
| PRDM1       | 1.12                |
| PRR7        | 10.86               |
| PRR7-AS1    | 0.48                |
| RHOA        | 176.8               |
| SKAP2       | 8.08                |
| SLC9B2      | 9.84                |
| SNAI2       | 0.6906              |
| STARD3      | 24.23               |
| TCTA        | 35.35               |
| TPD52L2     | 73.08               |
| UBAC2       | 11.29               |

**Supplementary Table 3. Genes implicated by IBDs SNPs-promoters interactions in colonoids.**

| PROXY_SNP  | SNP_LOC        | SENTINEL_SNP | R2       | GWAS_LOCUS | FRAG_RES | GENES                        |
|------------|----------------|--------------|----------|------------|----------|------------------------------|
| rs7554511  | chr1:200877562 | rs12132298   |          | 1 GPR25    | 4        | C1orf106                     |
| rs7554511  | chr1:200877562 | rs12132298   |          | 1 GPR25    | 4        | C1orf106                     |
| rs7554511  | chr1:200877562 | rs12132298   |          | 1 GPR25    | 4        |                              |
| rs7554511  | chr1:200877562 | rs12132298   |          | 1 GPR25    | 4        |                              |
| rs41299637 | chr1:200877850 | rs7554511    |          | 1 GPR25    | 4        | C1orf106                     |
| rs41299637 | chr1:200877850 | rs7554511    |          | 1 GPR25    | 4        | C1orf106                     |
| rs41299637 | chr1:200877850 | rs7554511    |          | 1 GPR25    | 4        |                              |
| rs41299637 | chr1:200877850 | rs7554511    |          | 1 GPR25    | 4        |                              |
| rs11230563 | chr11:60776209 | rs11230563   |          | 1 MS4A15   | 4        | CD6                          |
| rs11230563 | chr11:60776209 | rs11230563   |          | 1 MS4A15   | 4        |                              |
| rs2885363  | chr16:86009261 | rs2361755    |          | 1 IRF8     | 4        |                              |
| rs2885363  | chr16:86009261 | rs2361755    |          | 1 IRF8     | 4        |                              |
| rs744166   | chr17:40514201 | rs12942547   |          | 1 TNS4     | 4        |                              |
| rs17694108 | chr19:33731551 | rs17694108   |          | 1 CHST8    | 4        | CEBPG                        |
| rs17694108 | chr19:33731551 | rs17694108   |          | 1 CHST8    | 1        | CEBPG                        |
| rs17694108 | chr19:33731551 | rs17694108   |          | 1 CHST8    | 4        | CEBPG                        |
| rs17694108 | chr19:33731551 | rs17694108   |          | 1 CHST8    | 1        | CEBPG                        |
| rs17229679 | chr2:199560757 | rs17229679   |          | 1 SATB2    | 4        |                              |
| rs2930047  | chr5:10695526  | rs2930047    |          | 1 DAP      | 4        |                              |
| rs10061469 | chr5:72518148  | rs10061469   |          | 1 ZNF366   | 4        |                              |
| rs10061469 | chr5:72518148  | rs10061469   |          | 1 ZNF366   | 4        | FOXD1                        |
| rs10061469 | chr5:72518148  | rs10061469   |          | 1 ZNF366   | 4        | RP11-79P5.7 AC099522.1 FOXD1 |
| rs249642   | chr5:141524980 | rs6863411    |          | 1 PCDHGA1  | 4        | GNPDA1                       |
| rs249642   | chr5:141524980 | rs6863411    |          | 1 PCDHGA1  | 1        | GNPDA1                       |
| rs13204048 | chr6:3420406   | rs13204048   |          | 1 SLC22A23 | 4        |                              |
| rs3801807  | chr7:26897439  | rs10486483   |          | 1 SKAP2    | 4        | SKAP2                        |
| rs3801807  | chr7:26897439  | rs10486483   |          | 1 SKAP2    | 4        |                              |
| rs3801807  | chr7:26897439  | rs10486483   |          | 1 SKAP2    | 1        |                              |
| rs3801807  | chr7:26897439  | rs10486483   |          | 1 SKAP2    | 4        |                              |
| rs3801807  | chr7:26897439  | rs10486483   |          | 1 SKAP2    | 1        |                              |
| rs3801807  | chr7:26897439  | rs10486483   |          | 1 SKAP2    | 4        | HOXA-AS2                     |
| rs3801807  | chr7:26897439  | rs10486483   |          | 1 SKAP2    | 4        |                              |
| rs3801807  | chr7:26897439  | rs10486483   |          | 1 SKAP2    | 4        | HOXA3 HOXA-AS3               |
| rs3801807  | chr7:26897439  | rs10486483   |          | 1 SKAP2    | 4        | HOXA5                        |
| rs3801807  | chr7:26897439  | rs10486483   |          | 1 SKAP2    | 1        | HOXA5                        |
| rs3801807  | chr7:26897439  | rs10486483   |          | 1 SKAP2    | 4        | HOXA9                        |
| rs3801807  | chr7:26897439  | rs10486483   |          | 1 SKAP2    | 1        | HOXA9                        |
| rs3801807  | chr7:26897439  | rs10486483   |          | 1 SKAP2    | 4        |                              |
| rs3801805  | chr7:26897640  | rs3801810    |          | 1 SKAP2    | 4        | SKAP2                        |
| rs3801805  | chr7:26897640  | rs3801810    |          | 1 SKAP2    | 4        |                              |
| rs3801805  | chr7:26897640  | rs3801810    |          | 1 SKAP2    | 1        |                              |
| rs3801805  | chr7:26897640  | rs3801810    |          | 1 SKAP2    | 4        |                              |
| rs3801805  | chr7:26897640  | rs3801810    |          | 1 SKAP2    | 1        | HOXA-AS2                     |
| rs3801805  | chr7:26897640  | rs3801810    |          | 1 SKAP2    | 4        |                              |
| rs3801805  | chr7:26897640  | rs3801810    |          | 1 SKAP2    | 4        | HOXA3 HOXA-AS3               |
| rs3801805  | chr7:26897640  | rs3801810    |          | 1 SKAP2    | 4        | HOXA5                        |
| rs3801805  | chr7:26897640  | rs3801810    |          | 1 SKAP2    | 1        | HOXA5                        |
| rs3801805  | chr7:26897640  | rs3801810    |          | 1 SKAP2    | 4        | HOXA9                        |
| rs3801805  | chr7:26897640  | rs3801810    |          | 1 SKAP2    | 1        | HOXA9                        |
| rs3801805  | chr7:26897640  | rs3801810    |          | 1 SKAP2    | 4        |                              |
| rs543104   | chr11:96025709 | rs483905     | 0.99522  | MAML2      | 4        | MAML2                        |
| rs579807   | chr11:96026073 | rs483905     | 0.99522  | MAML2      | 4        | MAML2                        |
| rs538636   | chr11:96026190 | rs483905     | 0.99522  | MAML2      | 4        | MAML2                        |
| rs11669923 | chr19:33731379 | rs17694108   | 0.995152 | CHST8      | 4        | CEBPG                        |
| rs11669923 | chr19:33731379 | rs17694108   | 0.995152 | CHST8      | 1        | CEBPG                        |
| rs11669923 | chr19:33731379 | rs17694108   | 0.995152 | CHST8      | 4        | CEBPG                        |
| rs11669923 | chr19:33731379 | rs17694108   | 0.995152 | CHST8      | 1        | CEBPG                        |
| rs9633740  | chr10:82265271 | rs7097656    | 0.993519 | NRG3       | 1        | FAM213A                      |

|            |                 |            |          |          |   |                                                     |
|------------|-----------------|------------|----------|----------|---|-----------------------------------------------------|
| rs9633740  | chr10:82265271  | rs7097656  | 0.993519 | NRG3     | 1 | TSPAN14                                             |
| rs9633740  | chr10:82265271  | rs7097656  | 0.993519 | NRG3     | 1 |                                                     |
| rs2871960  | chr3:141121814  | rs724016   | 0.991895 | SPSB4    | 4 |                                                     |
| rs11666367 | chr19:47120381  | rs11083840 | 0.991673 | SAE1     | 1 | TCONS_00027384                                      |
| rs12765038 | chr10:35416513  | rs34779708 | 0.991399 | CCNY     | 1 | CUL2                                                |
| rs9568150  | chr13:49672440  | rs2026029  | 0.990616 | RCBTB1   | 1 | FNDC3A                                              |
| rs4781128  | chr16:11707571  | rs11641184 | 0.988013 | TXNDC11  | 4 |                                                     |
| rs4934730  | chr10:35415555  | rs34779708 | 0.987124 | CCNY     | 1 | CUL2                                                |
| rs67111717 | chr5:176790162  | rs4976646  | 0.986912 | UNC5A    | 4 | LMAN2                                               |
| rs67111717 | chr5:176790162  | rs4976646  | 0.986912 | UNC5A    | 4 |                                                     |
| rs67111717 | chr5:176790162  | rs4976646  | 0.986912 | UNC5A    | 4 | PRR7 PRR7-AS1                                       |
| rs12993075 | chr2:65658144   | rs11675538 | 0.986357 | SPRED2   | 1 | SPRED2                                              |
| rs12993075 | chr2:65658144   | rs11675538 | 0.986357 | SPRED2   | 1 |                                                     |
| rs539598   | chr11:96026074  | rs483905   | 0.9857   | MAML2    | 4 | MAML2                                               |
| rs2283044  | chr7:107440553  | rs7797798  | 0.983684 | COG5     | 1 | DLD                                                 |
| rs7783301  | chr7:107491324  | rs4380874  | 0.983605 | COG5     | 4 | COG5 DUS4L                                          |
| rs7783301  | chr7:107491324  | rs4380874  | 0.983605 | COG5     | 4 | AC002467.7 CBLL1                                    |
| rs16935880 | chr10:35415468  | rs34779708 | 0.982834 | CCNY     | 1 | CUL2                                                |
| rs8014798  | chr14:88456559  | rs8005161  | 0.977916 | PTPN21   | 1 | SPATA7                                              |
| rs8014798  | chr14:88456559  | rs8005161  | 0.977916 | PTPN21   | 4 | SPATA7                                              |
| rs73178580 | chr3:18799878   | rs73178598 | 0.973947 | KCNH8    | 4 | SATB1                                               |
| rs73178580 | chr3:18799878   | rs73178598 | 0.973947 | KCNH8    | 4 | SATB1                                               |
| rs73178580 | chr3:18799878   | rs73178598 | 0.973947 | KCNH8    | 4 | SATB1 TBC1D5 TCONS_I2_0<br>0018461 AC144521.1 TCONS |
| rs73178580 | chr3:18799878   | rs73178598 | 0.973947 | KCNH8    | 4 |                                                     |
| rs73069539 | chr7:26903661   | rs10486483 | 0.971376 | SKAP2    | 1 | SKAP2                                               |
| rs73069539 | chr7:26903661   | rs10486483 | 0.971376 | SKAP2    | 1 |                                                     |
| rs73069539 | chr7:26903661   | rs10486483 | 0.971376 | SKAP2    | 1 |                                                     |
| rs73069539 | chr7:26903661   | rs10486483 | 0.971376 | SKAP2    | 1 |                                                     |
| rs73069539 | chr7:26903661   | rs10486483 | 0.971376 | SKAP2    | 1 | HOXA5                                               |
| rs9557205  | chr13:100035272 | rs3742130  | 0.971363 | CLYBL    | 4 |                                                     |
| rs72797306 | chr5:131800750  | rs2188962  | 0.970913 | FNIP1    | 4 | C5orf56                                             |
| rs1182968  | chr16:68573945  | rs1728785  | 0.970097 | ZFP90    | 1 | ZFP90                                               |
| rs1182968  | chr16:68573945  | rs1728785  | 0.970097 | ZFP90    | 1 |                                                     |
| rs1170442  | chr16:68574064  | rs1728785  | 0.970097 | ZFP90    | 1 | ZFP90                                               |
| rs1170442  | chr16:68574064  | rs1728785  | 0.970097 | ZFP90    | 1 |                                                     |
| rs76447456 | chr3:18809802   | rs73178598 | 0.965202 | KCNH8    | 4 | SATB1                                               |
| rs76447456 | chr3:18809802   | rs73178598 | 0.965202 | KCNH8    | 4 | SATB1 TBC1D5 TCONS_I2_0<br>0018461 AC144521.1 TCONS |
| rs76447456 | chr3:18809802   | rs73178598 | 0.965202 | KCNH8    | 4 |                                                     |
| rs76447456 | chr3:18809802   | rs73178598 | 0.965202 | KCNH8    | 4 |                                                     |
| rs76447456 | chr3:18809802   | rs73178598 | 0.965202 | KCNH8    | 1 |                                                     |
| rs76447456 | chr3:18809802   | rs73178598 | 0.965202 | KCNH8    | 4 |                                                     |
| rs76447456 | chr3:18809802   | rs73178598 | 0.965202 | KCNH8    | 4 |                                                     |
| rs4645854  | chr14:75746144  | rs1569328  | 0.962288 | TTL5     | 1 | TMED10                                              |
| rs1991431  | chr3:141133450  | rs724016   | 0.951724 | SPSB4    | 4 |                                                     |
| rs11174697 | chr12:40396449  | rs12422544 | 0.943489 | LRRK2    | 4 | SLC2A13                                             |
| rs798491   | chr7:2800521    | rs1182188  | 0.94336  | GNA12    | 4 |                                                     |
| rs798491   | chr7:2800521    | rs1182188  | 0.94336  | GNA12    | 1 |                                                     |
| rs798491   | chr7:2800521    | rs1182188  | 0.94336  | GNA12    | 1 |                                                     |
| rs4783653  | chr16:68562815  | rs1728785  | 0.941585 | ZFP90    | 1 | CDH3                                                |
| rs202653   | chr22:41840158  | rs727563   | 0.939603 | SREBF2   | 4 | ACO2 PHF5A                                          |
| rs10889356 | chr1:63155349   | rs1748195  | 0.926199 | ATG4C    | 1 | RP11-230B22.1 DOCK7                                 |
| rs10186307 | chr2:43839896   | rs10495903 | 0.918085 | DYNC2LI1 | 4 | ACO11242.6                                          |
| rs106860   | chr22:41840407  | rs727563   | 0.912708 | SREBF2   | 4 | ACO2 PHF5A                                          |
| rs6914698  | chr6:3428216    | rs13204048 | 0.90192  | SLC22A23 | 4 |                                                     |
| rs6916403  | chr6:3428489    | rs13204048 | 0.90192  | SLC22A23 | 4 |                                                     |
| rs34363169 | chr3:49537712   | rs3197999  | 0.887194 | GMPPB    | 1 | DAG1                                                |
| rs35261698 | chr3:49537839   | rs3197999  | 0.887194 | GMPPB    | 1 | DAG1                                                |
| rs2412960  | chr22:30363448  | rs131294   | 0.875558 | HORMAD2  | 4 | ASCC2                                               |
| rs12337739 | chr9:117670664  | rs4979473  | 0.870424 | TLR4     | 4 | TCONS_I2_00029570                                   |

|            |                |            |          |          |   |                         |
|------------|----------------|------------|----------|----------|---|-------------------------|
| rs12337739 | chr9:117670664 | rs4979473  | 0.870424 | TLR4     | 4 |                         |
| rs12337739 | chr9:117670664 | rs4979473  | 0.870424 | TLR4     | 4 | TNFSF15                 |
| rs12337739 | chr9:117670664 | rs4979473  | 0.870424 | TLR4     | 1 | TNFSF15                 |
| rs4959239  | chr6:3418794   | rs13204048 | 0.860597 | SLC22A23 | 4 |                         |
| rs4959239  | chr6:3418794   | rs13204048 | 0.860597 | SLC22A23 | 4 |                         |
| rs4959239  | chr6:3418794   | rs13204048 | 0.860597 | SLC22A23 | 4 |                         |
| rs9405639  | chr6:3419149   | rs13204048 | 0.860597 | SLC22A23 | 4 |                         |
| rs9405639  | chr6:3419149   | rs13204048 | 0.860597 | SLC22A23 | 4 |                         |
| rs9405639  | chr6:3419149   | rs13204048 | 0.860597 | SLC22A23 | 4 |                         |
| rs7049009  | chr9:117647508 | rs4979473  | 0.853959 | TLR4     | 4 | TNFSF15                 |
| rs11748193 | chr5:131725329 | rs2188962  | 0.85068  | FNIP1    | 4 | C5orf56                 |
| rs11748193 | chr5:131725329 | rs2188962  | 0.85068  | FNIP1    | 4 | GDF9 UQCRCQ             |
| rs2235092  | chr17:54911929 | rs3853824  | 0.843057 | TOM1L1   | 1 | RP11-670E13.3           |
| rs2235092  | chr17:54911929 | rs3853824  | 0.843057 | TOM1L1   | 1 | TRIM25                  |
|            |                |            |          |          |   | TCONS_00025252 TCONS_00 |
| rs61463201 | chr17:70636951 | rs17780256 | 0.837822 | KCNJ2    | 1 | 025151 TCONS_00026155 T |
|            |                |            |          |          |   | CONS_00025759 TCONS_000 |
|            |                |            |          |          |   | TCONS_00025252 TCONS_00 |
| rs60947290 | chr17:70636944 | rs17780256 | 0.836162 | KCNJ2    | 1 | 025151 TCONS_00026155 T |
|            |                |            |          |          |   | CONS_00025759 TCONS_000 |
|            |                |            |          |          |   | TCONS_00025252 TCONS_00 |
| rs58953467 | chr17:70636980 | rs17780256 | 0.836162 | KCNJ2    | 1 | 025151 TCONS_00026155 T |
|            |                |            |          |          |   | CONS_00025759 TCONS_000 |
| rs2941522  | chr17:37910368 | rs12946510 | 0.829413 | TBC1D3K  | 1 |                         |
| rs2108228  | chr7:107500913 | rs4380874  | 0.827543 | COG5     | 4 | AC002467.7 CBLL1        |
| rs59320291 | chr19:1184155  | rs74610550 | 0.819693 | STK11    | 4 | SBNO2                   |
| rs7191618  | chr16:28565667 | rs26528    | 0.818268 | IL27     | 4 |                         |
| rs9611577  | chr22:41793090 | rs727563   | 0.805445 | SREBF2   | 4 | TEF                     |
| rs9611577  | chr22:41793090 | rs727563   | 0.805445 | SREBF2   | 1 | ACO2 PHF5A              |
| rs9611577  | chr22:41793090 | rs727563   | 0.805445 | SREBF2   | 4 | ACO2 PHF5A              |
| rs10267797 | chr7:107515300 | rs4380874  | 0.805257 | COG5     | 4 |                         |
| rs10267797 | chr7:107515300 | rs4380874  | 0.805257 | COG5     | 4 | AC002467.7 CBLL1        |

**Supplementary Table4. Pathways enrichment in hypothalamic-like neurons and colonoids**

| p-value     | q-value     | term_goid  | term | term_name                                                    | members_input_overlap_geneids                                                                                                                                                                                                                                                                                           | size  | effective_size | effective_size |
|-------------|-------------|------------|------|--------------------------------------------------------------|-------------------------------------------------------------------------------------------------------------------------------------------------------------------------------------------------------------------------------------------------------------------------------------------------------------------------|-------|----------------|----------------|
| 1.70E-07    | 1.32E-05    | GO:0002520 | b    | 2 immune system development                                  | TCTA; FAM213A; CEBPG; SBNO2; GPR183; PRR7; HOXA5; HOXA3; PRDM1; SATB1; RHOA; SLC9B2; NFKB2; HOXA9                                                                                                                                                                                                                       | 928   | 925            | 925            |
| 7.99E-08    | 2.06E-05    | GO:0048534 | b    | 4 hematopoietic or lymphoid organ development                | TCTA; FAM213A; CEBPG; SBNO2; GPR183; PRR7; HOXA5; HOXA3; PRDM1; SATB1; RHOA; SLC9B2; NFKB2; HOXA9                                                                                                                                                                                                                       | 872   | 870            | 870            |
| 1.02E-06    | 9.74E-05    | GO:0048522 | b    | 4 positive regulation of cellular process                    | TNFSF15; SKAP2; TSPAN14; DOCK7; SPRED2; CD6; CBL1; ZFP90; GDF9; CEBPG; ATG16L1; GPR183; TEF; PRR7; HNRNPA2B1; NFKB2; CNTF; TRIM25; FOXD1; DAG1; LMAN2; SNAI2; MAML2; RHOA; CDH3; SBNO2; HOXA5; HOXA3; CREM; PHF5A; SLC9B2; HOXA9                                                                                        | 5324  | 5307           | 5307           |
| 1.13E-06    | 9.74E-05    | GO:0002521 | b    | 4 leukocyte differentiation                                  | FAM213A; SBNO2; CEBPG; GPR183; PRR7; PRDM1; SATB1; RHOA; SLC9B2; TCTA; TNFSF15; DOCK7; ZFP90; GDF9; CEBPG; ATG16L1; GPR183; TEF; PRR7; HNRNPA2B1; NFKB2; CNTF; FOXD1; DAG1; SNAI2; MAML2; RHOA; CDH3; SBNO2; HOXA5; HOXA3; CREM; PHF5A; HOXA9                                                                           | 504   | 502            | 502            |
| 1.85E-06    | 0.000132214 | GO:0031325 | b    | 5 positive regulation of cellular metabolic process          | TNFSF15; DOCK7; ZFP90; GDF9; CEBPG; GPR183; TEF; PRR7; HNRNPA2B1; NFKB2; CREM; CNTF; FOXD1; DAG1; SNAI2; MAML2; RHOA; CDH3; SBNO2; HOXA5; HOXA3; PRDM1; PHF5A; HOXA9                                                                                                                                                    | 3251  | 3239           | 3239           |
| 2.04E-06    | 0.000132214 | GO:0010604 | b    | 5 positive regulation of macromolecule metabolic process     | FAM213A; SBNO2; CEBPG; GPR183; PRR7; HOXA5; PRDM1; SATB1; RHOA; SLC9B2; TCTA; HOXA9                                                                                                                                                                                                                                     | 3268  | 3256           | 3256           |
| 2.39E-06    | 0.000132214 | GO:0030097 | b    | 5 hemopoiesis                                                | FAM213A; DOCK7; UQCRCQ; TMED10; GDF9; CEBPG; HOXA9; GPR183; PRR7; FNDC3A; NFKB2; CNTF; FOXD1; DAG1; SATB1; SNAI2; RHOA; ACO2; CDH3; SBNO2; HOXA5; HOXA3; PRDM1; SLC9B2; TCTA                                                                                                                                            | 830   | 828            | 828            |
| 1.42E-06    | 0.000137379 | GO:0048513 | b    | 3 animal organ development                                   | TNFSF15; SKAP2; TSPAN14; DOCK7; SPRED2; CD6; CBL1; ZFP90; DENND1B; GDF9; CEBPG; ATG16L1; GPR183; TEF; PRR7; HNRNPA2B1; NFKB2; CREM; CNTF; TRIM25; FOXD1; DAG1; LMAN2; SNAI2; MAML2; RHOA; CDH3; SBNO2; HOXA5; HOXA3; PRDM1; PHF5A; SLC9B2; HOXA9                                                                        | 3452  | 3442           | 3442           |
| 1.66E-06    | 0.000137379 | GO:0048518 | b    | 3 positive regulation of biological process                  | TNFSF15; DOCK7; ZFP90; GDF9; CEBPG; ATG16L1; GPR183; TEF; PRR7; HNRNPA2B1; NFKB2; CREM; CNTF; FOXD1; DAG1; SNAI2; MAML2; RHOA; CDH3; SBNO2; HOXA5; HOXA3; PRDM1; PHF5A; HOXA9                                                                                                                                           | 6051  | 6034           | 6034           |
| 2.23E-06    | 0.000144107 | GO:0009893 | b    | 4 positive regulation of metabolic process                   | CEBPG; TEF; FOXD1; HOXA5; HOXA3; PRDM1; SATB1; SNAI2; NFKB2; HOXA9; CREM                                                                                                                                                                                                                                                | 924   | 916            | 916            |
| 3.88E-05    | 0.000697877 | GO:0044212 | m    | 5 transcription regulatory region DNA binding                | CEBPG; TEF; FOXD1; HOXA5; HOXA3; PRDM1; SATB1; SNAI2; NFKB2; HOXA9; CREM                                                                                                                                                                                                                                                | 945   | 936            | 936            |
| 4.72E-05    | 0.000173365 | GO:0003690 | m    | 5 double-stranded DNA binding                                | CEBPG; TEF; FOXD1; HOXA5; HOXA3; PRDM1; SATB1; SNAI2; NFKB2; HOXA9; PRDM1                                                                                                                                                                                                                                               | 1134  | 1125           | 1125           |
| 5.20E-05    | 0.000173365 | GO:0043565 | m    | 5 sequence-specific DNA binding                              | TNFSF15; DOCK7; SPRED2; UBAC2; ZFP90; CBX3; TMED10; GDF9; CEBPG; ATG16L1; GPR183; TEF; PRR7; HNRNPA2B1; NFKB2; CREM; CNTF; TRIM25; FOXD1; DAG1; SATB1; PHF5A; SNAI2; MAML2; RHOA; CDH3; SBNO2; HOXA5; HOXA3; PRDM1; ASCC2; HOXA9                                                                                        | 6130  | 6106           | 6106           |
| 8.05E-06    | 0.000415309 | GO:0031323 | b    | 4 regulation of cellular metabolic process                   | TNFSF15; DOCK7; ZFP90; GDF9; CEBPG; GPR183; TEF; PRR7; HNRNPA2B1; NFKB2; CNTF; FOXD1; DAG1; SNAI2; MAML2; RHOA; SBNO2; HOXA5; HOXA3; CREM; PHF5A; HOXA9                                                                                                                                                                 | 3128  | 3116           | 3116           |
| 1.43E-05    | 0.000593563 | GO:0051173 | b    | 5 positive regulation of nitrogen compound metabolic process | FAM213A; SBNO2; CEBPG; GPR183; HOXA5; HOXA9; SLC9B2; TCTA                                                                                                                                                                                                                                                               | 408   | 406            | 406            |
| 1.62E-05    | 0.000697877 | GO:0030099 | b    | 4 myeloid cell differentiation                               | CEBPG; TEF; FOXD1; HOXA5; HOXA3; PRDM1; SATB1; SNAI2; NFKB2; HOXA9; CREM                                                                                                                                                                                                                                                | 926   | 918            | 918            |
| 3.96E-05    | 0.000870804 | GO:0001067 | m    | 4 regulatory region nucleic acid binding                     | TNFSF15; DOCK7; SPRED2; UBAC2; ZFP90; CBX3; TMED10; GDF9; CEBPG; GPR183; TEF; PRR7; HNRNPA2B1; NFKB2; CREM; CNTF; TRIM25; FOXD1; DAG1; SATB1; PHF5A; SNAI2; MAML2; RHOA; CDH3; SBNO2; HOXA5; HOXA3; PRDM1; ASCC2; HOXA9                                                                                                 | 6156  | 6133           | 6133           |
| 2.97E-05    | 0.001094414 | GO:0060255 | b    | 4 regulation of macromolecule metabolic process              | TNFSF15; DOCK7; SPRED2; UBAC2; ZFP90; CBX3; TMED10; GDF9; CEBPG; GPR183; TEF; PRR7; HNRNPA2B1; NFKB2; CREM; CNTF; TRIM25; FOXD1; DAG1; SATB1; PHF5A; SNAI2; MAML2; RHOA; SBNO2; HOXA5; HOXA3; PRDM1; ASCC2; HOXA9                                                                                                       | 5904  | 5881           | 5881           |
| 3.75E-05    | 0.001210573 | GO:0051171 | b    | 4 regulation of nitrogen compound metabolic process          | FAM213A; DOCK7; SPRED2; UQCRCQ; CBL1; TMED10; GDF9; CEBPG; HOXA9; GPR183; PRR7; FNDC3A; NFKB2; CREM; CNTF; DLD; FOXD1; DAG1; SATB1; SNAI2; RHOA; ACO2; CDH3; SBNO2; HOXA5; HOXA3; PRDM1; SLC9B2; TCTA                                                                                                                   | 5289  | 5275           | 5275           |
| 3.88E-05    | 0.001513589 | GO:0007275 | b    | 2 multicellular organism development                         | TNFSF15; DOCK7; SPRED2; UBAC2; ZFP90; CBX3; TMED10; GDF9; CEBPG; GPR183; TEF; PRR7; HNRNPA2B1; NFKB2; CREM; CNTF; TRIM25; FOXD1; DAG1; SATB1; PHF5A; SNAI2; MAML2; RHOA; SBNO2; HOXA5; HOXA3; PRDM1; ASCC2; HOXA9                                                                                                       | 6071  | 6047           | 6047           |
| 6.81E-05    | 0.001800506 | GO:0080090 | b    | 4 regulation of primary metabolic process                    | GNPDA1; ZFP90; CBX3; GDF9; CEBPG; TEF; HNRNPA2B1; NFKB2; CREM; DLD; TRIM25; FOXD1; SATB1; PHF5A; SNAI2; MAML2; RHOA; CDH3; SBNO2; HOXA5; HOXA3; PRDM1; ASCC2; HOXA9                                                                                                                                                     | 4296  | 4278           | 4278           |
| 7.56E-05    | 0.001800506 | GO:0019438 | b    | 4 aromatic compound biosynthetic process                     | SBNO2; TCTA                                                                                                                                                                                                                                                                                                             | 5     | 5              | 5              |
| 7.68E-05    | 0.001800506 | GO:0072675 | b    | 4 osteoclast fusion                                          | CNTF; CEBPG; SBNO2; SKAP2; GPR183; TSPAN14; PRR7; CD6; PRDM1; SATB1; RHOA; NFKB2; HOXA9                                                                                                                                                                                                                                 | 1435  | 1432           | 1432           |
| 0.000125071 | 0.002547778 | GO:0001775 | b    | 2 cell activation                                            | FAM213A; TNFSF15; SKAP2; TSPAN14; DOCK7; SPRED2; GPR22; CD6; UBAC2; CBL1; ZFP90; DENND1B; PHF5A; CBX3; TMED10; GDF9; CEBPG; HOXA9; ATG16L1; GPR183; TEF; PRR7; HNRNPA2B1; NFKB2; CREM; CNTF; DLD; TRIM25; FOXD1; DAG1; SATB1; LMAN2; SNAI2; MAML2; RHOA; CDH3; SBNO2; HOXA5; HOXA3; PRDM1; ASCC2; SLC9B2; TCTA; FAM111A | 11539 | 11499          | 11499          |
| 0.000169202 | 0.002547778 | GO:0050789 | b    | 2 regulation of biological process                           | FAM213A; DOCK7; UQCRCQ; GDF9; CEBPG; HOXA9; GPR183; PRR7; FNDC3A; NFKB2; CREM; CNTF; DLD; FOXD1; DAG1; SATB1; SNAI2; RHOA; CDH3; SBNO2; HOXA5; PRDM1; SLC9B2; TCTA                                                                                                                                                      | 4275  | 4265           | 4265           |
| 0.000217733 | 0.002547778 | GO:0048869 | b    | 2 cellular developmental process                             | SNAI2; HOXA5; FOXD1; PRDM1; DAG1                                                                                                                                                                                                                                                                                        | 196   | 196            | 196            |
| 0.000219004 | 0.002547778 | GO:0001763 | b    | 2 morphogenesis of a branching structure                     | FAM213A; DOCK7; SPRED2; UQCRCQ; CBL1; TMED10; GDF9; CEBPG; HOXA9; GPR183; PRR7; FNDC3A; NFKB2; CREM; CNTF; DLD; FOXD1; DAG1; SATB1; SNAI2; RHOA; ACO2; CDH3; SBNO2; HOXA5; HOXA3; PRDM1; SLC9B2; TCTA                                                                                                                   | 5790  | 5773           | 5773           |
| 0.000228647 | 0.002547778 | GO:0048856 | b    | 2 anatomical structure development                           | GNPDA1; ZFP90; CBX3; GDF9; CEBPG; TEF; HNRNPA2B1; NFKB2; CREM; DLD; TRIM25; FOXD1; SATB1; PHF5A; SNAI2; MAML2; RHOA; CDH3; SBNO2; HOXA5; HOXA3; PRDM1; ASCC2; HOXA9                                                                                                                                                     | 4434  | 4416           | 4416           |
| 0.000130347 | 0.002802458 | GO:1901362 | b    | 4 organic cyclic compound biosynthetic process               | TNFSF15; DOCK7; SPRED2; UBAC2; ZFP90; CBX3; TMED10; GDF9; CEBPG; ATG16L1; GPR183; TEF; PRR7; HNRNPA2B1; NFKB2; CREM; CNTF; TRIM25; FOXD1; DAG1; SATB1; PHF5A; SNAI2; MAML2; RHOA; CDH3; SBNO2; HOXA5; HOXA3; PRDM1; ASCC2; HOXA9                                                                                        | 6671  | 6647           | 6647           |
| 5.81E-05    | 0.00290677  | GO:0019222 | b    | 3 regulation of metabolic process                            | FAM213A; TNFSF15; SKAP2; TSPAN14; DOCK7; SPRED2; GPR22; CD6; UBAC2; CBL1; ZFP90; DENND1B; PHF5A; CBX3; TMED10; GDF9; CEBPG; HOXA9; ATG16L1; GPR183; TEF; PRR7; HNRNPA2B1; NFKB2; CREM; CNTF; DLD; TRIM25; FOXD1; DAG1; SATB1; LMAN2; SNAI2; MAML2; RHOA; CDH3; SBNO2; HOXA5; HOXA3; PRDM1; ASCC2; SLC9B2; TCTA          | 10850 | 10810          | 10810          |
| 7.87E-05    | 0.00290677  | GO:0050794 | b    | 3 regulation of cellular process                             | SKAP2; DOCK7; SPRED2; UBAC2; CBL1; ZFP90; CBX3; GDF9; CEBPG; HOXA9; PRR7; HNRNPA2B1; CDH3; CREM; CNTF; TRIM25; FOXD1; DAG1; SATB1; SNAI2; RHOA; SBNO2; HOXA5; HOXA3; PRDM1; TCTA; FAM111A                                                                                                                               | 5219  | 5201           | 5201           |
| 9.10E-05    | 0.00290677  | GO:0048519 | b    | 3 negative regulation of biological process                  | FAM213A; DOCK7; UQCRCQ; GDF9; CEBPG; HOXA9; GPR183; PRR7; FNDC3A; NFKB2; CREM; CNTF; DLD; FOXD1; DAG1; SATB1; SNAI2; RHOA; CDH3; SBNO2; HOXA5; PRDM1; SLC9B2; TCTA                                                                                                                                                      | 4089  | 4079           | 4079           |
| 0.000105064 | 0.00290677  | GO:0030154 | b    | 3 cell differentiation                                       | FAM213A; HOXA9; HOXA5; PRDM1; RHOA; SLC9B2; TCTA                                                                                                                                                                                                                                                                        | 420   | 418            | 418            |
| 0.000158626 | 0.003148109 | GO:1903706 | b    | 4 regulation of hemopoiesis                                  | GNPDA1; ZFP90; CBX3; GDF9; MAML2; TEF; HNRNPA2B1; NFKB2; CREM; DLD; TRIM25; FOXD1; SATB1; PHF5A; SNAI2; CEBPG; RHOA; SBNO2; HOXA5; HOXA3; PRDM1; ASCC2; HOXA9                                                                                                                                                           | 4222  | 4204           | 4204           |
| 0.000172419 | 0.00317743  | GO:0034654 | b    | 4 nucleobase-containing compound biosynthetic process        | CEBPG; HOXA5; HOXA3; GDF9; CEBPG; TEF; HNRNPA2B1; NFKB2; CREM; DLD; TRIM25; FOXD1; SATB1; PHF5A; SNAI2; CEBPG; RHOA; SBNO2; HOXA5; HOXA3; PRDM1; ASCC2; HOXA9                                                                                                                                                           | 437   | 437            | 437            |
| 0.000208333 | 0.003413383 | GO:0048732 | b    | 4 gland development                                          | GNPDA1; ZFP90; CBX3; GDF9; MAML2; TEF; HNRNPA2B1; NFKB2; CREM; DLD; TRIM25; FOXD1; SATB1; PHF5A; SNAI2; CEBPG; RHOA; SBNO2; HOXA5; HOXA3; PRDM1; ASCC2; HOXA9                                                                                                                                                           | 4285  | 4267           | 4267           |
| 0.000219385 | 0.003413383 | GO:0018130 | b    | 4 heterocycle biosynthetic process                           | TCTA; CNTF; GDF9; GPR183; DOCK7; FOXD1; HOXA5; PRDM1; FAM213A; SNAI2; RHOA; SLC9B2; CDH3; HOXA9; DAG1                                                                                                                                                                                                                   | 1963  | 1957           | 1957           |
| 0.000224913 | 0.003413383 | GO:2000026 | b    | 4 regulation of multicellular organismal development         | CEBPG; FOXD1                                                                                                                                                                                                                                                                                                            | 21    | 21             | 21             |
| 0.001566353 | 0.003915883 | GO:0008301 | m    | 5 DNA binding, bending                                       | ZFP90; CBX3; GDF9; MAML2; TEF; HNRNPA2B1; NFKB2; CREM; TRIM25; FOXD1; SATB1; PHF5A; SNAI2; CEBPG; RHOA; SBNO2; HOXA5; HOXA3; PRDM1; ASCC2; HOXA9                                                                                                                                                                        | 3645  | 3628           | 3628           |
| 0.000157113 | 0.005133266 | GO:0006351 | b    | 5 transcription, DNA-templated                               | ZFP90; CBX3; GDF9; MAML2; TEF; HNRNPA2B1; NFKB2; CREM; DLD; TRIM25; FOXD1; SATB1; PHF5A; SNAI2; CEBPG; RHOA; SBNO2; HOXA5; HOXA3; PRDM1; ASCC2; HOXA9                                                                                                                                                                   | 3705  | 3688           | 3688           |
| 0.000201267 | 0.005133266 | GO:0032774 | b    | 5 RNA biosynthetic process                                   | FAM213A; SBNO2; GPR183; SLC9B2; TCTA                                                                                                                                                                                                                                                                                    | 203   | 201            | 201            |
| 0.000246104 | 0.005133266 | GO:0002573 | b    | 5 myeloid leukocyte differentiation                          | SBNO2; CEBPG; NFKB2; TEF; FOXD1; HOXA5; HOXA3; HNRNPA2B1; ZFP90; PHF5A; MAML2; RHOA; CDH3; HOXA9; CREM                                                                                                                                                                                                                  | 1983  | 1974           | 1974           |
| 0.000247386 | 0.005133266 | GO:0009891 | b    | 5 positive regulation of biosynthetic process                | ZFP90; CBX3; GDF9; MAML2; TEF; HNRNPA2B1; NFKB2; CREM; TRIM25; FOXD1; SATB1; PHF5A; SNAI2; CEBPG; RHOA; SBNO2; HOXA5; HOXA3; PRDM1; ASCC2; HOXA9                                                                                                                                                                        | 3795  | 3778           | 3778           |
| 0.000288463 | 0.005320531 | GO:0051252 | b    | 5 regulation of RNA metabolic process                        | CNTF; GDF9; MAML2; TNFSF15; SKAP2; TRIM25; GPR183; TSPAN14; SPRED2; FOXD1; RHOA; PRR7; CDH3                                                                                                                                                                                                                             | 1579  | 1576           | 1576           |
| 0.000323296 | 0.00536671  | GO:0009967 | b    | 5 positive regulation of signal transduction                 | CEBPG; GPR183; PRR7; PRDM1; SATB1; RHOA                                                                                                                                                                                                                                                                                 | 342   | 342            | 342            |
| 0.000378267 | 0.005421832 | GO:0030098 | b    | 4 lymphocyte differentiation                                 | ZFP90; CBX3; GDF9; MAML2; TEF; HNRNPA2B1; NFKB2; CREM; TRIM25; FOXD1; SATB1; PHF5A; SNAI2; CEBPG; RHOA; CDH3; SBNO2; HOXA5; HOXA3; PRDM1; ASCC2; HOXA9                                                                                                                                                                  | 4174  | 4158           | 4158           |
| 0.0004209   | 0.006351763 | GO:0031326 | b    | 5 regulation of cellular biosynthetic process                |                                                                                                                                                                                                                                                                                                                         |       |                |                |

|             |             |            |   |   |                                                           |                                                                                                                                                                                                                                                                                                     |       |       |       |
|-------------|-------------|------------|---|---|-----------------------------------------------------------|-----------------------------------------------------------------------------------------------------------------------------------------------------------------------------------------------------------------------------------------------------------------------------------------------------|-------|-------|-------|
| 0.000467238 | 0.006463457 | GO:0010468 | b | 5 | regulation of gene expression                             | ZFP90; CBX3; GDF9; MAML2; TEF; HNRNPA2B1; NFKB2; CUL2; CREM; CNTF; TRIM25; FOXD1; SATB1; PHF5A; SNAI2; CEBPG; RHOA; CDH3; SBNO2; HOXA5; HOXA3; PRDM1; ASCC2; HOXA9 TCTA; CNTF; GDF9; CEBPG; NFKB2; GPR183; HOXA5; FOXD1; DOCK7; CD6; PRDM1; FAM213A; TRIM25; SNAI2; RHOA; SLC9B2; CDH3; HOXA9; DAG1 | 4492  | 4475  | 4475  |
| 0.000294556 | 0.00698518  | GO:0051239 | b | 3 | regulation of multicellular organismal process            | ZFP90; CBX3; GDF9; MAML2; TEF; HNRNPA2B1; NFKB2; CUL2; CREM; TRIM25; FOXD1; SATB1; PHF5A; SNAI2; CEBPG; RHOA; CDH3; SBNO2; HOXA5; HOXA3; PRDM1; ASCC2; HOXA9                                                                                                                                        | 2989  | 2983  | 2983  |
| 0.000545157 | 0.007082244 | GO:0009889 | b | 4 | regulation of biosynthetic process                        | CNTF; GDF9; CEBPG; TNFSF15; SKAP2; TRIM25; GPR183; TSPAN14; SPRED2; FOXD1; CD6; DENND1B; MAML2; RHOA; PRR7; CDH3                                                                                                                                                                                    | 4246  | 4230  | 4230  |
| 0.000549011 | 0.007082244 | GO:0048584 | b | 4 | positive regulation of response to stimulus               | FAM213A; DOCK7; UQCRCQ; TMED10; GDF9; CEBPG; HOXA9; GPR183; PRR7; FNDC3A; NFKB2; CNTF; FOXD1; DAG1; SATB1; SNAI2; RHOA; ACO2; CDH3; SBNO2; HOXA5; HOXA3; PRDM1; SLC9B2; TCTA                                                                                                                        | 2371  | 2366  | 2366  |
| 0.000367738 | 0.007630567 | GO:0048731 | b | 3 | system development                                        | FAM213A; HOXA5; SLC9B2; TCTA; HOXA9                                                                                                                                                                                                                                                                 | 4713  | 4699  | 4699  |
| 0.000631647 | 0.0080523   | GO:0045637 | b | 5 | regulation of myeloid cell differentiation                | ZFP90; CBX3; GDF9; MAML2; TEF; HNRNPA2B1; NFKB2; CUL2; CREM; TRIM25; FOXD1; SATB1; PHF5A; SNAI2; CEBPG; RHOA; SBNO2; HOXA5; HOXA3; PRDM1; ASCC2; HOXA9                                                                                                                                              | 249   | 247   | 247   |
| 0.000699292 | 0.0080523   | GO:0010556 | b | 5 | regulation of macromolecule biosynthetic process          | CBLL1; ZFP90; CBX3; GDF9; MAML2; TEF; HNRNPA2B1; NFKB2; CUL2; CREM; TRIM25; FOXD1; SATB1; PHF5A; SNAI2; CEBPG; RHOA; SBNO2; HOXA5; HOXA3; PRDM1; ASCC2; DUS4L; HOXA9                                                                                                                                | 4031  | 4015  | 4015  |
| 0.000775396 | 0.0080523   | GO:0016070 | b | 5 | RNA metabolic process                                     | ZFP90; CBX3; GDF9; MAML2; TEF; HNRNPA2B1; NFKB2; CUL2; CREM; TRIM25; FOXD1; SATB1; PHF5A; SNAI2; CEBPG; RHOA; SBNO2; HOXA5; HOXA3; PRDM1; ASCC2; DUS4L; HOXA9                                                                                                                                       | 4644  | 4624  | 4624  |
| 0.000799611 | 0.0080523   | GO:0019219 | b | 5 | regulation of nucleobase-containing compound metabolic    | PHF5A; SNAI2; CEBPG; RHOA; SBNO2; HOXA5; HOXA3; PRDM1; ASCC2; HOXA9                                                                                                                                                                                                                                 | 4070  | 4053  | 4053  |
| 0.000824633 | 0.0080523   | GO:0010647 | b | 5 | positive regulation of cell communication                 | CNTF; GDF9; MAML2; TNFSF15; SKAP2; TRIM25; GPR183; TSPAN14; SPRED2; FOXD1; RHOA; PRR7; CDH3                                                                                                                                                                                                         | 1741  | 1738  | 1738  |
| 0.000881537 | 0.008129731 | GO:1902105 | b | 5 | regulation of leukocyte differentiation                   | FAM213A; RHOA; SLC9B2; PRDM1; TCTA                                                                                                                                                                                                                                                                  | 268   | 266   | 266   |
| 0.000456375 | 0.008417581 | GO:0006725 | b | 3 | cellular aromatic compound metabolic process              | GNPDA1; UQCRCQ; CBLL1; ZFP90; CBX3; GDF9; CEBPG; TEF; HNRNPA2B1; NFKB2; CUL2; CREM; DLD; TRIM25; FOXD1; SATB1; PHF5A; SNAI2; MAML2; RHOA; CDH3; SBNO2; HOXA5; HOXA3; PRDM1; ASCC2; DUS4L; HOXA9; FAM111A                                                                                            | 6015  | 5989  | 5989  |
| 0.000896465 | 0.00986112  | GO:0001227 | m | 4 | DNA-binding transcription repressor activity, RNA polymer | SNAI2; ZFP90; PRDM1; SATB1; CREM                                                                                                                                                                                                                                                                    | 267   | 267   | 267   |
| 0.001039458 | 0.010134715 | GO:0021700 | b | 2 | developmental maturation                                  | RHOA; DLD; HOXA5; CDH3; DAG1                                                                                                                                                                                                                                                                        | 277   | 276   | 276   |
| 0.000856309 | 0.010520372 | GO:0023056 | b | 4 | positive regulation of signaling                          | CNTF; GDF9; MAML2; TNFSF15; SKAP2; TRIM25; GPR183; TSPAN14; SPRED2; FOXD1; RHOA; PRR7; CDH3                                                                                                                                                                                                         | 1748  | 1745  | 1745  |
| 0.001218634 | 0.010561498 | GO:0044237 | b | 2 | cellular metabolic process                                | TNFSF15; GNPDA1; TSPAN14; DOCK7; SPRED2; UQCRCQ; UBAC2; CBLL1; ZFP90; CBX3; TMED10; GDF9; CEBPG; ATG16L1; GPR183; TEF; PRR7; HNRNPA2B1; NFKB2; CUL2; CREM; CNTF; DLD; TRIM25; FOXD1; DAG1; SATB1; PHF5A; SNAI2; MAML2; RHOA; ACO2; CDH3; SBNO2; HOXA5; HOXA3; PRDM1; ASCC2; DUS4L; HOXA9; FAM111A   | 10637 | 10598 | 10598 |
| 0.000642256 | 0.010661454 | GO:0006139 | b | 3 | nucleobase-containing compound metabolic process          | GNPDA1; UQCRCQ; CBLL1; ZFP90; CBX3; GDF9; CEBPG; TEF; HNRNPA2B1; NFKB2; CUL2; CREM; DLD; TRIM25; FOXD1; SATB1; PHF5A; SNAI2; MAML2; RHOA; SBNO2; HOXA5; HOXA3; PRDM1; ASCC2; DUS4L; HOXA9; FAM111A                                                                                                  | 5810  | 5784  | 5784  |
| 0.000961894 | 0.011280388 | GO:0046649 | b | 4 | lymphocyte activation                                     | CEBPG; SKAP2; GPR183; PRR7; CD6; PRDM1; SATB1; RHOA                                                                                                                                                                                                                                                 | 737   | 736   | 736   |
| 0.001172372 | 0.011723722 | GO:0016604 | c | 5 | nuclear body                                              | MAML2; TRIM25; DENND1B; HNRNPA2B1; SATB1; PHF5A; ASCC2; CBLL1                                                                                                                                                                                                                                       | 760   | 759   | 759   |
| 0.000845038 | 0.011909637 | GO:1901360 | b | 3 | organic cyclic compound metabolic process                 | GNPDA1; UQCRCQ; CBLL1; ZFP90; CBX3; GDF9; CEBPG; TEF; HNRNPA2B1; NFKB2; CUL2; CREM; DLD; TRIM25; FOXD1; SATB1; PHF5A; SNAI2; MAML2; RHOA; CDH3; SBNO2; HOXA5; HOXA3; PRDM1; ASCC2; DUS4L; HOXA9; FAM111A                                                                                            | 6220  | 6194  | 6194  |
| 0.000860938 | 0.011909637 | GO:0044260 | b | 3 | cellular macromolecule metabolic process                  | TNFSF15; TSPAN14; DOCK7; SPRED2; UBAC2; CBLL1; ZFP90; CBX3; GDF9; CEBPG; ATG16L1; GPR183; TEF; PRR7; HNRNPA2B1; NFKB2; CUL2; PRDM1; CNTF; DLD; TRIM25; FOXD1; DAG1; SATB1; PHF5A; SNAI2; MAML2; RHOA; SBNO2; HOXA5; HOXA3; CREM; ASCC2; HOXA9; FAM111A                                              | 8256  | 8225  | 8225  |
| 0.001026152 | 0.012242655 | GO:0046483 | b | 3 | heterocycle metabolic process                             | GNPDA1; UQCRCQ; CBLL1; ZFP90; CBX3; GDF9; CEBPG; TEF; HNRNPA2B1; NFKB2; CUL2; CREM; DLD; TRIM25; FOXD1; SATB1; PHF5A; SNAI2; MAML2; RHOA; SBNO2; HOXA5; HOXA3; PRDM1; ASCC2; DUS4L; HOXA9; FAM111A                                                                                                  | 5967  | 5941  | 5941  |
| 0.001050726 | 0.012242655 | GO:0071695 | b | 3 | anatomical structure maturation                           | RHOA; HOXA5; CDH3; DAG1                                                                                                                                                                                                                                                                             | 161   | 160   | 160   |
| 0.001106264 | 0.012242655 | GO:0043170 | b | 3 | macromolecule metabolic process                           | TNFSF15; TSPAN14; DOCK7; SPRED2; UBAC2; CBLL1; ZFP90; CBX3; TMED10; GDF9; CEBPG; ATG16L1; GPR183; TEF; PRR7; HNRNPA2B1; NFKB2; CUL2; CREM; CNTF; DLD; TRIM25; FOXD1; DAG1; SATB1; PHF5A; SNAI2; MAML2; RHOA; CDH3; SBNO2; HOXA5; HOXA3; PRDM1; ASCC2; DUS4L; HOXA9; FAM111A                         | 9445  | 9411  | 9411  |
| 0.001274335 | 0.014294714 | GO:0042127 | b | 4 | regulation of cell proliferation                          | CNTF; GDF9; SKAP2; GPR183; HOXA5; CD6; HOXA3; PRDM1; SNAI2; RHOA; CDH3; CUL2                                                                                                                                                                                                                        | 1601  | 1592  | 1592  |
| 0.001390292 | 0.014945642 | GO:0010467 | b | 4 | gene expression                                           | TSPAN14; ZFP90; CBX3; GDF9; CEBPG; TEF; HNRNPA2B1; NFKB2; CUL2; CREM; CNTF; TRIM25; FOXD1; SATB1; PHF5A; SNAI2; CEBPG; RHOA; SBNO2; HOXA5; HOXA3; PRDM1; ASCC2; DUS4L; HOXA9                                                                                                                        | 5440  | 5417  | 5417  |
| 0.001441532 | 0.014955896 | GO:0044403 | b | 3 | symbiont process                                          | TRIM25; DAG1; SATB1; ATG16L1; RHOA; FAM111A; CUL2; CBLL1                                                                                                                                                                                                                                            | 784   | 784   | 784   |
| 0.001588629 | 0.014974949 | GO:0048468 | b | 3 | cell development                                          | CNTF; GDF9; DLD; UQCRCQ; GPR183; DOCK7; FOXD1; HOXA5; PRDM1; SNAI2; FNDC3A; RHOA; SLC9B2; DAG1                                                                                                                                                                                                      | 2110  | 2106  | 2106  |
| 0.001688804 | 0.014974949 | GO:0061138 | b | 3 | morphogenesis of a branching epithelium                   | SNAI2; HOXA5; DAG1; FOXD1                                                                                                                                                                                                                                                                           | 182   | 182   | 182   |
| 0.00175005  | 0.014974949 | GO:0050886 | b | 3 | endocrine process                                         | RHOA; GDF9; FOXD1                                                                                                                                                                                                                                                                                   | 85    | 85    | 85    |
| 0.001804211 | 0.014974949 | GO:0034641 | b | 3 | cellular nitrogen compound metabolic process              | GNPDA1; UQCRCQ; CBLL1; ZFP90; CBX3; TMED10; GDF9; CEBPG; TEF; HNRNPA2B1; NFKB2; CUL2; CREM; DLD; TRIM25; FOXD1; SATB1; PHF5A; SNAI2; MAML2; RHOA; SBNO2; HOXA5; HOXA3; PRDM1; ASCC2; DUS4L; HOXA9; FAM111A                                                                                          | 6494  | 6465  | 6465  |
| 0.001573298 | 0.01562432  | GO:0034645 | b | 4 | cellular macromolecule biosynthetic process               | ZFP90; CBX3; GDF9; MAML2; ATG16L1; TEF; HNRNPA2B1; NFKB2; CUL2; CREM; TRIM25; FOXD1; SATB1; PHF5A; SNAI2; CEBPG; RHOA; SBNO2; HOXA5; HOXA3; PRDM1; ASCC2; HOXA9; FAM111A                                                                                                                            | 4867  | 4847  | 4847  |
| 0.001574544 | 0.01562432  | GO:0090304 | b | 4 | nucleic acid metabolic process                            | CBLL1; ZFP90; CBX3; GDF9; MAML2; TEF; HNRNPA2B1; NFKB2; CUL2; CREM; TRIM25; FOXD1; SATB1; PHF5A; SNAI2; CEBPG; RHOA; SBNO2; HOXA5; HOXA3; PRDM1; ASCC2; DUS4L; HOXA9; FAM111A                                                                                                                       | 5174  | 5151  | 5151  |
| 0.001665993 | 0.01591949  | GO:0042110 | b | 4 | T cell activation                                         | GPR183; PRR7; CD6; PRDM1; SATB1; RHOA                                                                                                                                                                                                                                                               | 456   | 455   | 455   |
| 0.001764755 | 0.016260959 | GO:0044271 | b | 4 | cellular nitrogen compound biosynthetic process           | GNPDA1; ZFP90; CBX3; GDF9; MAML2; TEF; HNRNPA2B1; NFKB2; CUL2; CREM; DLD; TRIM25; FOXD1; SATB1; PHF5A; SNAI2; CEBPG; RHOA; SBNO2; HOXA5; HOXA3; PRDM1; ASCC2; HOXA9                                                                                                                                 | 4906  | 4885  | 4885  |
| 0.00054143  | 0.016393542 | GO:0034399 | c | 4 | nuclear periphery                                         | PHF5A; DAG1; SATB1; HNRNPA2B1                                                                                                                                                                                                                                                                       | 134   | 134   | 134   |
| 0.000819677 | 0.016393542 | GO:0005654 | c | 4 | nucleoplasm                                               | MAML2; CEBPG; DLD; SKAP2; TRIM25; DENND1B; SPATA7; COG5; DAG1; CBLL1; HOXA3; HNRNPA2B1; SATB1; PHF5A; SNAI2; ASCC2; NFKB2; CBX3; CUL2; PRDM1                                                                                                                                                        | 3520  | 3501  | 3501  |
| 0.002111519 | 0.016469847 | GO:0044419 | b | 2 | interspecies interaction between organisms                | TRIM25; DAG1; SATB1; ATG16L1; RHOA; FAM111A; CUL2; CBLL1                                                                                                                                                                                                                                            | 833   | 833   | 833   |
| 0.000824633 | 0.016492662 | GO:0003700 | m | 2 | DNA-binding transcription factor activity                 | CEBPG; ZFP90; TEF; FOXD1; HOXA5; HOXA3; PRDM1; SATB1; SNAI2; PHF5A; NFKB2; HOXA9; CREM                                                                                                                                                                                                              | 1750  | 1738  | 1738  |
| 0.001880319 | 0.016728354 | GO:0060445 | b | 4 | branching involved in salivary gland morphogenesis        | SNAI2; DAG1                                                                                                                                                                                                                                                                                         | 23    | 23    | 23    |
| 0.002581321 | 0.016775023 | GO:0006807 | b | 2 | nitrogen compound metabolic process                       | TNFSF15; GNPDA1; TSPAN14; DOCK7; SPRED2; UQCRCQ; UBAC2; CBLL1; ZFP90; CBX3; TMED10; GDF9; CEBPG; ATG16L1; GPR183; TEF; PRR7; HNRNPA2B1; NFKB2; CUL2; PRDM1; CNTF; DLD; TRIM25; FOXD1; DAG1; SATB1; PHF5A; SNAI2; MAML2; RHOA; SBNO2; HOXA5; HOXA3; CREM; ASCC2; DUS4L; HOXA9; FAM111A               | 10174 | 10136 | 10136 |
| 0.002666417 | 0.016775023 | GO:0045321 | b | 2 | leukocyte activation                                      | SBNO2; CEBPG; SKAP2; GPR183; TSPAN14; PRR7; CD6; PRDM1; SATB1; RHOA                                                                                                                                                                                                                                 | 1284  | 1281  | 1281  |
| 0.002795837 | 0.016775023 | GO:0048646 | b | 2 | anatomical structure formation involved in morphogenesis  | SBNO2; FOXD1; HOXA5; HOXA3; DAG1; SNAI2; RHOA; NFKB2; TCTA                                                                                                                                                                                                                                          | 1078  | 1075  | 1075  |
| 0.003075416 | 0.017063797 | GO:0071704 | b | 2 | organic substance metabolic process                       | TNFSF15; GNPDA1; TSPAN14; DOCK7; SPRED2; UQCRCQ; UBAC2; CBLL1; ZFP90; CBX3; TMED10; GDF9; CEBPG; ATG16L1; GPR183; TEF; PRR7; HNRNPA2B1; NFKB2; CUL2; CREM; CNTF; DLD; TRIM25; FOXD1; DAG1; SATB1; PHF5A; SNAI2; MAML2; RHOA; ACO2; CDH3; SBNO2; HOXA5; HOXA3; PRDM1; ASCC2; DUS4L; HOXA9; FAM111A   | 11025 | 10986 | 10986 |
| 0.003281499 | 0.017063797 | GO:0044238 | b | 2 | primary metabolic process                                 | TNFSF15; GNPDA1; TSPAN14; DOCK7; SPRED2; UQCRCQ; UBAC2; CBLL1; ZFP90; CBX3; TMED10; GDF9; CEBPG; ATG16L1; GPR183; TEF; PRR7; HNRNPA2B1; NFKB2; CUL2; CREM; CNTF; DLD; TRIM25; FOXD1; DAG1; SATB1; PHF5A; SNAI2; MAML2; RHOA; ACO2; SBNO2; HOXA5; HOXA3; PRDM1; ASCC2; DUS4L; HOXA9; FAM111A         | 10663 | 10624 | 10624 |
| 0.003572521 | 0.017416039 | GO:0009653 | b | 2 | anatomical structure morphogenesis                        | TCTA; CNTF; SBNO2; DLD; NFKB2; DOCK7; FOXD1; HOXA5; HOXA3; PRDM1; SNAI2; RHOA; CDH3; HOXA9; DAG1                                                                                                                                                                                                    | 2560  | 2554  | 2554  |
| 0.003870321 | 0.017757941 | GO:0001816 | b | 2 | cytokine production                                       | CEBPG; TRIM25; CD6; SNAI2; DENND1B; NFKB2; CDH3                                                                                                                                                                                                                                                     | 723   | 722   | 722   |
| 0.002047578 | 0.017889369 | GO:0030878 | b | 5 | thyroid gland development                                 | HOXA5; HOXA3                                                                                                                                                                                                                                                                                        | 24    | 24    | 24    |
| 0.004444454 | 0.019259299 | GO:0009058 | b | 2 | biosynthetic process                                      | GNPDA1; ZFP90; CBX3; GDF9; CEBPG; ATG16L1; TEF; HNRNPA2B1; NFKB2; CUL2; CREM; DLD; TRIM25; FOXD1; SATB1; PHF5A; SNAI2; MAML2; RHOA; CDH3; SBNO2; HOXA5; HOXA3; PRDM1; ASCC2; HOXA9; FAM111A                                                                                                         | 6185  | 6163  | 6163  |
| 0.002403768 | 0.020672408 | GO:0009059 | b | 4 | macromolecule biosynthetic process                        | ZFP90; CBX3; GDF9; MAML2; ATG16L1; TEF; HNRNPA2B1; NFKB2; CUL2; CREM; TRIM25; FOXD1; SATB1; PHF5A; SNAI2; CEBPG; RHOA; SBNO2; HOXA5; HOXA3; PRDM1; ASCC2; HOXA9; FAM111A                                                                                                                            | 5010  | 4990  | 4990  |

|             |             |            |   |   |                                                                     |                                                                                                                                                                                                                        |      |      |      |
|-------------|-------------|------------|---|---|---------------------------------------------------------------------|------------------------------------------------------------------------------------------------------------------------------------------------------------------------------------------------------------------------|------|------|------|
| 0.002867384 | 0.02134675  | GO:0050793 | b | 3 | regulation of developmental process                                 | TCTA; CNTF; GDF9; GPR183; DOCK7; FOXD1; HOXA5; PRDM1; FAM213A; SNAI2; RHOA; SLC9B2; CDH3; HOXA9; DAG1                                                                                                                  | 2503 | 2497 | 2497 |
| 0.00289906  | 0.02134675  | GO:0044093 | b | 3 | positive regulation of molecular function                           | CEBPg; TNFSF15; TRIM25; NFKB2; DOCK7; PRR7; HOXA3; HNRNPA2B1; DENND1B; RHOA; CDH3; DAG1                                                                                                                                | 1755 | 1754 | 1754 |
| 0.002957682 | 0.02134675  | GO:0044249 | b | 3 | cellular biosynthetic process                                       | GNPDA1; ZFP90; CBX3; GDF9; CEBPG; ATG16L1; TEF; HNRNPA2B1; NFKB2; CUL2; CREM; DLD; TRIM25; FOXD1; SATB1; PHF5A; SNAI2; MAML2; RHOA; CDH3; SBNO2; HOXA5; HOXA3; PRDM1; ASCC2; HOXA9; FAM111A                            | 6026 | 6004 | 6004 |
| 0.002804365 | 0.023339557 | GO:0045595 | b | 4 | regulation of cell differentiation                                  | FAM213A; CNTF; GPR183; DOCK7; HOXA5; PRDM1; SNAI2; RHOA; SLC9B2; TCTA; HOXA9; DAG1                                                                                                                                     | 1753 | 1747 | 1747 |
| 0.002985122 | 0.024067547 | GO:0060536 | b | 4 | cartilage morphogenesis                                             | SNAI2; HOXA5                                                                                                                                                                                                           | 29   | 29   | 29   |
| 0.003494181 | 0.024168086 | GO:0048583 | b | 3 | regulation of response to stimulus                                  | CNTF; GDF9; CEBPG; PRR7; TNFSF15; SBNO2; SKAP2; TRIM25; GPR183; TSPAN14; SPRED2; FOXD1; CD6; UBAC2; DAG1; DENND1B; SNAI2; MAML2; RHOA; SLC9B2; CDH3                                                                    | 4227 | 4219 | 4219 |
| 0.003123805 | 0.024422477 | GO:0001501 | b | 4 | skeletal system development                                         | HOXA5; HOXA3; SNAI2; RHOA; SLC9B2; HOXA9                                                                                                                                                                               | 518  | 516  | 516  |
| 0.00369629  | 0.024543362 | GO:1901576 | b | 3 | organic substance biosynthetic process                              | GNPDA1; ZFP90; CBX3; GDF9; CEBPG; ATG16L1; TEF; HNRNPA2B1; NFKB2; CUL2; CREM; DLD; TRIM25; FOXD1; SATB1; PHF5A; SNAI2; MAML2; RHOA; CDH3; SBNO2; HOXA5; HOXA3; PRDM1; ASCC2; HOXA9; FAM111A                            | 6112 | 6090 | 6090 |
| 0.002985122 | 0.024776514 | GO:0060441 | b | 5 | epithelial tube branching involved in lung morphogenesis            | HOXA5; DAG1                                                                                                                                                                                                            | 29   | 29   | 29   |
| 0.002544011 | 0.027656031 | GO:0031981 | c | 4 | nuclear lumen                                                       | MAML2; CEBPG; DLD; SKAP2; TRIM25; DENND1B; SPATA7; COG5; DAG1; CBLL1; HOXA3; HNRNPA2B1; SATB1; PHF5A; SNAI2; ASCC2; NFKB2; FAM111A; CBX3; CUL2; PRDM1                                                                  | 4134 | 4115 | 4115 |
| 0.003448716 | 0.027656031 | GO:0005634 | c | 4 | nucleus                                                             | SKAP2; DOCK7; CBLL1; ZFP90; DENND1B; CBX3; CEBPG; TEF; PRR7; HNRNPA2B1; NFKB2; CUL2; PRDM1; DLD; TRIM25; COG5; FOXD1; DAG1; SATB1; PHF5A; SNAI2; MAML2; RHOA; SBNO2; HOXA5; HOXA3; CREM; ASCC2; SPATA7; HOXA9; FAM111A | 7415 | 7386 | 7386 |
| 0.003457004 | 0.027656031 | GO:0016363 | c | 4 | nuclear matrix                                                      | PHF5A; HNRNPA2B1; SATB1                                                                                                                                                                                                | 108  | 108  | 108  |
| 0.003841033 | 0.029146659 | GO:0016032 | b | 4 | viral process                                                       | TRIM25; DAG1; SATB1; ATG16L1; RHOA; CUL2; FAM111A                                                                                                                                                                      | 721  | 721  | 721  |
| 0.004087966 | 0.032314398 | GO:0007435 | b | 5 | salivary gland morphogenesis                                        | SNAI2; DAG1                                                                                                                                                                                                            | 34   | 34   | 34   |
| 0.005623076 | 0.033520674 | GO:0043616 | b | 3 | keratinocyte proliferation                                          | SNAI2; CDH3                                                                                                                                                                                                            | 40   | 40   | 40   |
| 0.005641526 | 0.033520674 | GO:0009887 | b | 3 | animal organ morphogenesis                                          | CNTF; FOXD1; HOXA5; HOXA3; PRDM1; SNAI2; RHOA; DAG1                                                                                                                                                                    | 981  | 979  | 979  |
| 0.00565409  | 0.033520674 | GO:0007281 | b | 3 | germ cell development                                               | FNDC3A; GDF9; PRDM1; DLD                                                                                                                                                                                               | 255  | 255  | 255  |
| 0.004706273 | 0.033639401 | GO:0051172 | b | 5 | negative regulation of nitrogen compound metabolic process          | SBNO2; PRDM1; ZFP90; SPRED2; FOXD1; CREM; UBAC2; HNRNPA2B1; SATB1; SNAI2; RHOA; PRR7; CBX3; DAG1                                                                                                                       | 2369 | 2366 | 2366 |
| 0.00482709  | 0.033639401 | GO:0007431 | b | 5 | salivary gland development                                          | SNAI2; DAG1                                                                                                                                                                                                            | 37   | 37   | 37   |
| 0.004863528 | 0.033639401 | GO:0007043 | b | 5 | cell-cell junction assembly                                         | SNAI2; RHOA; CDH3                                                                                                                                                                                                      | 122  | 122  | 122  |
| 0.004574349 | 0.033719491 | GO:0033280 | b | 4 | response to vitamin D                                               | SNAI2; TRIM25                                                                                                                                                                                                          | 36   | 36   | 36   |
| 0.008680719 | 0.034159838 | GO:0051716 | b | 2 | cellular response to stimulus                                       | FAM213A; TNFSF15; SKAP2; TSPAN14; DOCK7; SPRED2; GPR22; CD6; UBAC2; DENND1B; CBX3; GDF9; CEBPG; GPR183; PRR7; HNRNPA2B1; NFKB2; CUL2; CNTF; TRIM25; FOXD1; DAG1; SNAI2;                                                | 7471 | 7448 | 7448 |
| 0.008758933 | 0.034159838 | GO:0019953 | b | 2 | sexual reproduction                                                 | MAML2; RHOA; CDH3; SBNO2; CREM; ASCC2; SLC9B2                                                                                                                                                                          | 841  | 841  | 841  |
| 0.004863528 | 0.034330726 | GO:0038061 | b | 4 | NIK/NF-kappaB signaling                                             | RHOA; NFKB2; TNFSF15                                                                                                                                                                                                   | 122  | 122  | 122  |
| 0.004923399 | 0.034330726 | GO:0051241 | b | 4 | negative regulation of multicellular organismal process             | CNTF; TRIM25; DOCK7; HOXA5; TCTA; SNAI2; RHOA; CDH3; HOXA9                                                                                                                                                             | 1174 | 1171 | 1171 |
| 0.005132004 | 0.034843607 | GO:0048523 | b | 4 | negative regulation of cellular process                             | SKAP2; SPRED2; UBAC2; CBLL1; ZFP90; CBX3; GDF9; HOXA9; PRR7; HNRNPA2B1; CUL2; PRDM1; CNTF; FOXD1; DAG1; SATB1; SNAI2; RHOA; SBNO2; HOXA5; CREM; TCTA                                                                   | 4670 | 4652 | 4652 |
| 0.001603153 | 0.03526936  | GO:0000981 | m | 3 | DNA-binding transcription factor activity, RNA polymerase           | CEBPg; ZFP90; TEF; FOXD1; HOXA5; HOXA3; PRDM1; SATB1; SNAI2; NFKB2; HOXA9; CREM                                                                                                                                        | 1646 | 1635 | 1635 |
| 0.005320014 | 0.035324893 | GO:0048706 | b | 5 | embryonic skeletal system development                               | HOXA5; HOXA3; HOXA9                                                                                                                                                                                                    | 126  | 126  | 126  |
| 0.00555761  | 0.036765728 | GO:0006119 | b | 4 | oxidative phosphorylation                                           | RHOA; UQCRCQ; DLD                                                                                                                                                                                                      | 128  | 128  | 128  |
| 0.0083447   | 0.039011189 | GO:0001228 | m | 4 | DNA-binding transcription activator activity, RNA polymerase        | HOXA5; CEBPG; NFKB2; TEF; FOXD1                                                                                                                                                                                        | 457  | 449  | 449  |
| 0.008620909 | 0.039011189 | GO:0005126 | m | 4 | cytokine receptor binding                                           | CNTF; GDF9; SPRED2; TNFSF15                                                                                                                                                                                            | 288  | 288  | 288  |
| 0.008866179 | 0.039011189 | GO:0003677 | m | 4 | DNA binding                                                         | CEBPg; ZFP90; TEF; FOXD1; HOXA5; CREM; HOXA3; HNRNPA2B1; SATB1; SNAI2; PHF5A; NFKB2; HOXA9; PRDM1                                                                                                                      | 2557 | 2542 | 2542 |
| 0.006439074 | 0.039588379 | GO:0044409 | b | 5 | entry into host                                                     | HOXA9; PRDM1                                                                                                                                                                                                           | 135  | 135  | 135  |
| 0.006439074 | 0.039588379 | GO:0051806 | b | 5 | entry into cell of other organism involved in symbiotic interaction | TRIM25; DAG1; CBLL1                                                                                                                                                                                                    | 135  | 135  | 135  |
| 0.006724385 | 0.039865996 | GO:0042063 | b | 5 | gliogenesis                                                         | TRIM25; DAG1; CBLL1                                                                                                                                                                                                    | 135  | 135  | 135  |
| 0.007073447 | 0.040489385 | GO:0031103 | b | 5 | axon regeneration                                                   | CNTF; RHOA; GPR183; DAG1                                                                                                                                                                                               | 268  | 268  | 268  |
| 0.006439074 | 0.040773993 | GO:0051828 | b | 4 | entry into other organism involved in symbiotic interaction         | CNTF; DAG1                                                                                                                                                                                                             | 45   | 45   | 45   |
| 0.006551617 | 0.040773993 | GO:0060485 | b | 4 | mesenchyme development                                              | TRIM25; DAG1; CBLL1                                                                                                                                                                                                    | 135  | 135  | 135  |
| 0.006637627 | 0.040773993 | GO:0061448 | b | 4 | connective tissue development                                       | SNAI2; HOXA5; DAG1; FOXD1                                                                                                                                                                                              | 266  | 266  | 266  |
| 0.011923184 | 0.042608835 | GO:0140253 | b | 2 | cell-cell fusion                                                    | SNAI2; HOXA5; HOXA3; FOXD1                                                                                                                                                                                             | 267  | 267  | 267  |
| 0.012017876 | 0.042608835 | GO:0065009 | b | 2 | regulation of molecular function                                    | SBNO2; TCTA                                                                                                                                                                                                            | 62   | 59   | 59   |
| 0.012707064 | 0.043093521 | GO:0006949 | b | 2 | syncytium formation                                                 | CNTF; GDF9; CEBPG; TNFSF15; TRIM25; NFKB2; DOCK7; SPRED2; PRR7; HOXA3; DAG1; ZFP90; DENND1B; RHOA; CDH3; HNRNPA2B1                                                                                                     | 3198 | 3193 | 3193 |
| 0.013437705 | 0.043672541 | GO:0009566 | b | 2 | fertilization                                                       | SBNO2; TCTA                                                                                                                                                                                                            | 64   | 61   | 61   |
| 0.008016351 | 0.044000932 | GO:0060986 | b | 5 | endocrine hormone secretion                                         | FNDC3A; GNPDA1; HOXA9                                                                                                                                                                                                  | 177  | 177  | 177  |
| 0.008286827 | 0.044000932 | GO:1903707 | b | 5 | negative regulation of hemopoiesis                                  | GDF9; FOXD1                                                                                                                                                                                                            | 48   | 48   | 48   |
| 0.008482107 | 0.044000932 | GO:0031324 | b | 5 | negative regulation of cellular metabolic process                   | HOXA5; TCTA; HOXA9                                                                                                                                                                                                     | 150  | 148  | 148  |
| 0.022975898 | 0.045951796 | GO:0061630 | m | 5 | ubiquitin protein ligase activity                                   | SBNO2; PRDM1; ZFP90; SPRED2; FOXD1; CREM; UBAC2; HNRNPA2B1; SATB1; SNAI2; RHOA; PRR7; CBX3; DAG1                                                                                                                       | 2532 | 2529 | 2529 |
| 0.009144496 | 0.045999586 | GO:0019058 | b | 5 | viral life cycle                                                    | TRIM25; CBLL1; CUL2                                                                                                                                                                                                    | 217  | 217  | 217  |
| 0.008342556 | 0.047753944 | GO:0061383 | b | 3 | trabecula morphogenesis                                             | TRIM25; FAM111A; DAG1; ATG16L1                                                                                                                                                                                         | 293  | 293  | 293  |
| 0.008016351 | 0.048098106 | GO:0035272 | b | 4 | exocrine system development                                         | SBNO2; RHOA                                                                                                                                                                                                            | 49   | 49   | 49   |
| 0.010061316 | 0.049122895 | GO:0002066 | b | 5 | columnar/cuboidal epithelial cell development                       | SNAI2; DAG1                                                                                                                                                                                                            | 48   | 48   | 48   |
| 0.010422375 | 0.049431838 | GO:0002011 | b | 5 | morphogenesis of an epithelial sheet                                | HOXA5; PRDM1                                                                                                                                                                                                           | 54   | 54   | 54   |
| 0.008595928 | 0.049734697 | GO:0048754 | b | 4 | branching morphogenesis of an epithelial tube                       | RHOA; DAG1                                                                                                                                                                                                             | 55   | 55   | 55   |
| 0.008674656 | 0.049734697 | GO:0060425 | b | 4 | lung morphogenesis                                                  | HOXA5; DAG1; FOXD1                                                                                                                                                                                                     | 150  | 150  | 150  |
|             |             |            |   |   |                                                                     | HOXA5; DAG1                                                                                                                                                                                                            | 50   | 50   | 50   |

**Supplementary Table 5. Pathways enrichment in hypothalamic-like neurons**

| p-value     | q-value     | term_goid  | term_category | term_level | term_name                                                                | members_input_overlap_genes                                                                                                                    | size  | effective_size |
|-------------|-------------|------------|---------------|------------|--------------------------------------------------------------------------|------------------------------------------------------------------------------------------------------------------------------------------------|-------|----------------|
| 2.11E-05    | 0.002950745 | GO:0002521 | b             | 4          | leukocyte differentiation                                                | GPR183; PRR7; PRDM1; RHOA; SLC9B2; TCTA                                                                                                        | 504   | 502            |
| 4.87E-05    | 0.00340628  | GO:0048534 | b             | 4          | hematopoietic or lymphoid organ development                              | GPR183; PRR7; PRDM1; NFKB2; SLC9B2; RHOA; TCTA                                                                                                 | 872   | 870            |
| 7.18E-05    | 0.003950183 | GO:0002520 | b             | 2          | immune system development                                                | GPR183; PRR7; PRDM1; NFKB2; SLC9B2; RHOA; TCTA                                                                                                 | 928   | 925            |
| 0.001675352 | 0.005790994 | GO:0043565 | m             | 5          | sequence-specific DNA binding                                            | FOXD1; CREM; HNRNPA2B1; SNAI2; NFKB2; PRDM1                                                                                                    | 1134  | 1125           |
| 0.00396008  | 0.005790994 | GO:0044212 | m             | 5          | transcription regulatory region DNA binding                              | SNAI2; NFKB2; FOXD1; PRDM1; CREM                                                                                                               | 924   | 916            |
| 0.004343245 | 0.005790994 | GO:0003690 | m             | 5          | double-stranded DNA binding                                              | SNAI2; NFKB2; FOXD1; PRDM1; CREM                                                                                                               | 945   | 936            |
| 0.000251041 | 0.011715265 | GO:0009893 | b             | 4          | positive regulation of metabolic process                                 | CNTF; HNRNPA2B1; GPR183; FOXD1; PRDM1; ATG16L1; SNAI2; PHF5A; RHOA; PRR7; NFKB2; CREM                                                          | 3537  | 3525           |
| 0.000256258 | 0.011959961 | GO:1902105 | b             | 5          | regulation of leukocyte differentiation                                  | RHOA; SLC9B2; PRDM1; TCTA                                                                                                                      | 268   | 266            |
| 0.00033393  | 0.011959961 | GO:0030097 | b             | 5          | hemopoiesis                                                              | GPR183; PRR7; PRDM1; RHOA; SLC9B2; TCTA                                                                                                        | 830   | 828            |
| 0.000556963 | 0.011959961 | GO:0031325 | b             | 5          | positive regulation of cellular metabolic process                        | CNTF; ATG16L1; GPR183; FOXD1; HNRNPA2B1; SNAI2; PHF5A; RHOA; PRR7; NFKB2; CREM                                                                 | 3251  | 3239           |
| 0.000583413 | 0.011959961 | GO:0010604 | b             | 5          | positive regulation of macromolecule metabolic process                   | CNTF; HNRNPA2B1; GPR183; FOXD1; PRDM1; SNAI2; PHF5A; RHOA; PRR7; NFKB2; CREM                                                                   | 3268  | 3256           |
| 0.001949859 | 0.013324162 | GO:0032934 | m             | 4          | sterol binding                                                           | STARD3; GPR183                                                                                                                                 | 55    | 55             |
| 0.003801386 | 0.013324162 | GO:0001227 | m             | 4          | DNA-binding transcription repressor activity, RNA polymerase II-specific | SNAI2; PRDM1; CREM                                                                                                                             | 267   | 267            |
| 0.003997248 | 0.013324162 | GO:0001067 | m             | 4          | regulatory region nucleic acid binding                                   | SNAI2; NFKB2; FOXD1; PRDM1; CREM                                                                                                               | 926   | 918            |
| 0.001018014 | 0.015379065 | GO:0051172 | b             | 5          | negative regulation of nitrogen compound metabolic process               | FOXD1; CREM; UBAC2; HNRNPA2B1; SNAI2; RHOA; PRR7; CBX3; PRDM1                                                                                  | 2369  | 2366           |
| 0.001649618 | 0.015379065 | GO:0031324 | b             | 5          | negative regulation of cellular metabolic process                        | FOXD1; CREM; UBAC2; HNRNPA2B1; SNAI2; RHOA; PRR7; CBX3; PRDM1                                                                                  | 2532  | 2529           |
| 0.001700818 | 0.015379065 | GO:0002573 | b             | 5          | myeloid leukocyte differentiation                                        | GPR183; SLC9B2; TCTA                                                                                                                           | 203   | 201            |
| 0.001804674 | 0.015379065 | GO:0051173 | b             | 5          | positive regulation of nitrogen compound metabolic process               | CNTF; GPR183; FOXD1; HNRNPA2B1; SNAI2; PHF5A; RHOA; PRR7; NFKB2; CREM                                                                          | 3128  | 3116           |
| 0.001810343 | 0.015379065 | GO:0009890 | b             | 5          | negative regulation of biosynthetic process                              | FOXD1; CREM; HNRNPA2B1; SNAI2; RHOA; CBX3; PRDM1                                                                                               | 1571  | 1571           |
| 0.001875496 | 0.015379065 | GO:2000027 | b             | 5          | regulation of animal organ morphogenesis                                 | SNAI2; CNTF; RHOA                                                                                                                              | 208   | 208            |
| 0.000184297 | 0.016771008 | GO:0048518 | b             | 3          | positive regulation of biological process                                | CNTF; PRR7; SKAP2; HNRNPA2B1; GPR183; FOXD1; ATG16L1; DENND1B; PRDM1; LMAN2; SNAI2; PHF5A; RHOA; SLC9B2; NFKB2; CREM                           | 6051  | 6034           |
| 0.00247038  | 0.018415558 | GO:0046530 | b             | 5          | photoreceptor cell differentiation                                       | CNTF; PRDM1                                                                                                                                    | 62    | 62             |
| 0.000662691 | 0.023194169 | GO:0030098 | b             | 4          | lymphocyte differentiation                                               | RHOA; GPR183; PRDM1; PRR7                                                                                                                      | 342   | 342            |
| 0.000831279 | 0.02327582  | GO:0048522 | b             | 4          | positive regulation of cellular process                                  | CNTF; PRR7; SKAP2; ATG16L1; GPR183; FOXD1; CREM; LMAN2; SNAI2; PHF5A; RHOA; SLC9B2; NFKB2; HNRNPA2B1                                           | 5324  | 5307           |
| 0.003841435 | 0.026249807 | GO:0042063 | b             | 5          | gliogenesis                                                              | CNTF; RHOA; GPR183                                                                                                                             | 268   | 268            |
| 0.001356046 | 0.026694553 | GO:2000026 | b             | 4          | regulation of multicellular organismal development                       | CNTF; GPR183; FOXD1; PRDM1; SNAI2; RHOA; SLC9B2; TCTA                                                                                          | 1963  | 1957           |
| 0.001396861 | 0.026694553 | GO:1903706 | b             | 4          | regulation of hemopoiesis                                                | RHOA; SLC9B2; PRDM1; TCTA                                                                                                                      | 420   | 418            |
| 0.001525403 | 0.026694553 | GO:0046649 | b             | 4          | lymphocyte activation                                                    | SKAP2; PHF5A; RHOA; GPR183; PRDM1; PRR7                                                                                                        | 737   | 736            |
| 0.000900098 | 0.028829858 | GO:0002250 | b             | 3          | adaptive immune response                                                 | DENND1B; NFKB2; GPR183; PRDM1; PRR7                                                                                                            | 657   | 654            |
| 0.000950435 | 0.028829858 | GO:0048513 | b             | 3          | animal organ development                                                 | CNTF; SLC9B2; PRR7; GPR183; FOXD1; PRDM1; SNAI2; RHOA; ACO2; NFKB2; TCTA                                                                       | 3452  | 3442           |
| 0.001051301 | 0.028910768 | GO:0001775 | b             | 2          | cell activation                                                          | CNTF; SKAP2; GPR183; PRR7; PRDM1; RHOA; NFKB2                                                                                                  | 1435  | 1432           |
| 0.001582558 | 0.029013556 | GO:0001763 | b             | 2          | morphogenesis of a branching structure                                   | SNAI2; PRDM1; FOXD1                                                                                                                            | 196   | 196            |
| 0.001906631 | 0.029658706 | GO:0042110 | b             | 4          | T cell activation                                                        | RHOA; GPR183; PRDM1; PRR7                                                                                                                      | 456   | 455            |
| 0.002392424 | 0.033493938 | GO:0072678 | b             | 4          | T cell migration                                                         | RHOA; GPR183                                                                                                                                   | 61    | 61             |
| 0.005695234 | 0.035923781 | GO:0062014 | b             | 5          | negative regulation of small molecule metabolic process                  | SNAI2; RHOA                                                                                                                                    | 95    | 95             |
| 0.001730485 | 0.036775107 | GO:0050794 | b             | 3          | regulation of cellular process                                           | CNTF; PRR7; ATG16L1; SKAP2; HNRNPA2B1; GPR183; FOXD1; SNAI2; DENND1B; UBAC2; PRDM1; LMAN2; GPR22; PHF5A; RHOA; SLC9B2; CBX3; NFKB2; TCTA; CREM | 10850 | 10810          |
| 0.00202061  | 0.036775107 | GO:0003170 | b             | 3          | heart valve development                                                  | SNAI2; PRDM1                                                                                                                                   | 56    | 56             |
| 0.00332984  | 0.039797521 | GO:0045595 | b             | 4          | regulation of cell differentiation                                       | CNTF; GPR183; PRDM1; SNAI2; RHOA; SLC9B2; TCTA                                                                                                 | 1753  | 1747           |
| 0.003411216 | 0.039797521 | GO:0048523 | b             | 4          | negative regulation of cellular process                                  | CNTF; SKAP2; FOXD1; CREM; UBAC2; HNRNPA2B1; SNAI2; RHOA; PRR7; CBX3; TCTA; PRDM1                                                               | 4670  | 4652           |
| 0.003703636 | 0.039885312 | GO:0031323 | b             | 4          | regulation of cellular metabolic process                                 | CNTF; HNRNPA2B1; GPR183; FOXD1; UBAC2; PRDM1; ATG16L1; SNAI2; PHF5A; RHOA; PRR7; CBX3; NFKB2; CREM                                             | 6130  | 6106           |
| 0.0041878   | 0.041878    | GO:0009892 | b             | 4          | negative regulation of metabolic process                                 | FOXD1; CREM; UBAC2; HNRNPA2B1; SNAI2; RHOA; PRR7; CBX3; PRDM1                                                                                  | 2890  | 2887           |
| 0.008919222 | 0.044533794 | GO:0009967 | b             | 5          | positive regulation of signal transduction                               | CNTF; SKAP2; GPR183; PRR7; RHOA; FOXD1                                                                                                         | 1579  | 1576           |
| 0.008966843 | 0.044533794 | GO:0045596 | b             | 5          | negative regulation of cell differentiation                              | SNAI2; CNTF; RHOA; TCTA                                                                                                                        | 706   | 703            |
| 0.009119744 | 0.044533794 | GO:0010605 | b             | 5          | negative regulation of macromolecule metabolic process                   | FOXD1; CREM; UBAC2; HNRNPA2B1; SNAI2; PRR7; CBX3; PRDM1                                                                                        | 2653  | 2650           |
| 0.009232616 | 0.044533794 | GO:0007043 | b             | 5          | cell-cell junction assembly                                              | SNAI2; RHOA                                                                                                                                    | 122   | 122            |
| 0.004907527 | 0.045803587 | GO:1901888 | b             | 4          | regulation of cell junction assembly                                     | SNAI2; RHOA                                                                                                                                    | 88    | 88             |
| 0.004000563 | 0.047837298 | GO:0030154 | b             | 3          | cell differentiation                                                     | CNTF; PRR7; GPR183; FOXD1; PRDM1; SNAI2; RHOA; SLC9B2; NFKB2; TCTA; CREM                                                                       | 4089  | 4079           |
| 0.004586722 | 0.047837298 | GO:0050886 | b             | 3          | endocrine process                                                        | RHOA; FOXD1                                                                                                                                    | 85    | 85             |
| 0.004881406 | 0.047837298 | GO:0030522 | b             | 3          | intracellular receptor signaling pathway                                 | SNAI2; RHOA; CREM                                                                                                                              | 292   | 292            |
| 0.005239206 | 0.047837298 | GO:0051239 | b             | 3          | regulation of multicellular organismal process                           | CNTF; GPR183; FOXD1; PRDM1; SNAI2; RHOA; SLC9B2; NFKB2; TCTA                                                                                   | 2989  | 2983           |
| 0.005256846 | 0.047837298 | GO:0009887 | b             | 3          | animal organ morphogenesis                                               | SNAI2; CNTF; RHOA; PRDM1; FOXD1                                                                                                                | 981   | 979            |

Supplementary Table 6. Pathways enrichment in colonoids

| p-value     | q-value     | term_goid  | term_category | term_level | term_name                                                           | members_input_overlap_genes                                                                                                                                   | size | effective_size |
|-------------|-------------|------------|---------------|------------|---------------------------------------------------------------------|---------------------------------------------------------------------------------------------------------------------------------------------------------------|------|----------------|
| 1.12E-05    | 0.002033455 | GO:0048522 | b             | 4          | positive regulation of cellular process                             | TNFSF15; SKAP2; TSPAN14; DOCK7; SPRED2; CD6; CBLL1; ZFP90; GDF9; CEBPG; TEF; PRR7; CDH3; TRIM25; FOXD1; DAG1; LMAN2; MAML2; SBNO2; HOXA5; HOXA3; PHF5A; HOXA9 | 5324 | 5307           |
| 0.00073718  | 0.004785161 | GO:0008301 | m             | 5          | DNA binding, bending                                                | CEBPG; FOXD1                                                                                                                                                  | 21   | 21             |
| 0.001585377 | 0.004785161 | GO:0044212 | m             | 5          | transcription regulatory region DNA binding                         | CEBPG; TEF; FOXD1; HOXA5; HOXA3; SATB1; HOXA9                                                                                                                 | 924  | 916            |
| 0.001794435 | 0.004785161 | GO:0003690 | m             | 5          | double-stranded DNA binding                                         | CEBPG; TEF; FOXD1; HOXA5; HOXA3; SATB1; HOXA9                                                                                                                 | 945  | 936            |
| 7.71E-05    | 0.006335136 | GO:0048513 | b             | 3          | animal organ development                                            | FAM213A; SBNO2; GDF9; CEBPG; PRR7; UQCRCQ; DOCK7; FOXD1; HOXA5; HOXA3; DAG1; SATB1; FNDC3A; CDH3; ACO2; HOXA9; TMED10                                         | 3452 | 3442           |
| 0.000107375 | 0.006335136 | GO:0048518 | b             | 3          | positive regulation of biological process                           | TNFSF15; SKAP2; TSPAN14; DOCK7; SPRED2; CD6; CBLL1; ZFP90; GDF9; CEBPG; TEF; PRR7; CDH3; TRIM25; FOXD1; DAG1; LMAN2; MAML2; SBNO2; HOXA5; HOXA3; PHF5A; HOXA9 | 6051 | 6034           |
| 0.000143396 | 0.007334844 | GO:0031325 | b             | 5          | positive regulation of cellular metabolic process                   | SBNO2; GDF9; CEBPG; TNFSF15; DOCK7; TEF; FOXD1; HOXA5; HOXA3; DAG1; ZFP90; PHF5A; MAML2; CDH3; PRR7; HOXA9                                                    | 3251 | 3239           |
| 0.000152809 | 0.007334844 | GO:0010604 | b             | 5          | positive regulation of macromolecule metabolic process              | SBNO2; GDF9; CEBPG; TNFSF15; DOCK7; TEF; FOXD1; HOXA5; HOXA3; DAG1; ZFP90; PHF5A; MAML2; CDH3; PRR7; HOXA9                                                    | 3268 | 3256           |
| 0.005015961 | 0.010031923 | GO:0043565 | m             | 5          | sequence-specific DNA binding                                       | CEBPG; TEF; FOXD1; HOXA5; HOXA3; SATB1; HOXA9                                                                                                                 | 1134 | 1125           |
| 0.000348845 | 0.011163036 | GO:0051173 | b             | 5          | positive regulation of nitrogen compound metabolic process          | SBNO2; GDF9; CEBPG; TNFSF15; DOCK7; TEF; FOXD1; HOXA5; HOXA3; DAG1; ZFP90; PHF5A; MAML2; PRR7; HOXA9                                                          | 3128 | 3116           |
| 0.000168939 | 0.012131161 | GO:0048732 | b             | 4          | gland development                                                   | CEBPG; HOXA5; HOXA3; DAG1; ACO2; HOXA9                                                                                                                        | 437  | 437            |
| 0.000201762 | 0.012131161 | GO:0048534 | b             | 4          | hematopoietic or lymphoid organ development                         | FAM213A; SBNO2; CEBPG; PRR7; HOXA5; HOXA3; SATB1; HOXA9                                                                                                       | 872  | 870            |
| 0.000353206 | 0.012131161 | GO:0019438 | b             | 4          | aromatic compound biosynthetic process                              | SBNO2; GDF9; MAML2; CEBPG; ZFP90; DLD; TRIM25; GNPDA1; TEF; FOXD1; HOXA5; HOXA3; CUL2; SATB1; PHF5A; ASCC2; CDH3; HOXA9                                       | 4296 | 4278           |
| 0.000394478 | 0.012131161 | GO:0009893 | b             | 4          | positive regulation of metabolic process                            | SBNO2; GDF9; CEBPG; TNFSF15; DOCK7; TEF; FOXD1; HOXA5; HOXA3; DAG1; ZFP90; PHF5A; MAML2; CDH3; PRR7; HOXA9                                                    | 3537 | 3525           |
| 0.000453476 | 0.012131161 | GO:0031323 | b             | 4          | regulation of cellular metabolic process                            | TNFSF15; DOCK7; SPRED2; ZFP90; TMED10; GDF9; MAML2; TEF; PRR7; CDH3; CUL2; TRIM25; FOXD1; DAG1; SATB1; ASCC2; CEBPG; SBNO2; HOXA5; HOXA3; PHF5A; HOXA9        | 6130 | 6106           |
| 0.000485829 | 0.012131161 | GO:0060255 | b             | 4          | regulation of macromolecule metabolic process                       | TNFSF15; DOCK7; SPRED2; ZFP90; TMED10; GDF9; MAML2; TEF; PRR7; CDH3; CUL2; TRIM25; FOXD1; DAG1; SATB1; ASCC2; CEBPG; SBNO2; HOXA5; HOXA3; PHF5A; HOXA9        | 6156 | 6133           |
| 0.000533238 | 0.012131161 | GO:1901362 | b             | 4          | organic cyclic compound biosynthetic process                        | SBNO2; GDF9; MAML2; CEBPG; ZFP90; DLD; TRIM25; GNPDA1; TEF; FOXD1; HOXA5; HOXA3; CUL2; SATB1; PHF5A; ASCC2; CDH3; HOXA9                                       | 4434 | 4416           |
| 0.008271009 | 0.013233615 | GO:0061630 | m             | 5          | ubiquitin protein ligase activity                                   | TRIM25; CBLL1; CUL2                                                                                                                                           | 217  | 217            |
| 0.000585493 | 0.013239158 | GO:0009967 | b             | 5          | positive regulation of signal transduction                          | GDF9; MAML2; TNFSF15; SKAP2; TRIM25; TSPAN14; SPRED2; FOXD1; CDH3; PRR7                                                                                       | 1579 | 1576           |
| 0.000875169 | 0.013239158 | GO:0009891 | b             | 5          | positive regulation of biosynthetic process                         | SBNO2; CEBPG; TEF; FOXD1; HOXA5; HOXA3; ZFP90; PHF5A; MAML2; CDH3; HOXA9                                                                                      | 1983 | 1974           |
| 0.000881297 | 0.013239158 | GO:0030097 | b             | 5          | hemopoiesis                                                         | FAM213A; SBNO2; CEBPG; PRR7; HOXA5; SATB1; HOXA9                                                                                                              | 830  | 828            |
| 0.000965355 | 0.013239158 | GO:0030878 | b             | 5          | thyroid gland development                                           | HOXA5; HOXA3                                                                                                                                                  | 24   | 24             |
| 0.003006081 | 0.015030406 | GO:0016604 | c             | 5          | nuclear body                                                        | MAML2; TRIM25; CBLL1; SATB1; ASCC2; PHF5A                                                                                                                     | 760  | 759            |
| 0.001254592 | 0.015055104 | GO:0010647 | b             | 5          | positive regulation of cell communication                           | GDF9; MAML2; TNFSF15; SKAP2; TRIM25; TSPAN14; SPRED2; FOXD1; CDH3; PRR7                                                                                       | 1741 | 1738           |
| 0.001411492 | 0.01505591  | GO:0060441 | b             | 5          | epithelial tube branching involved in lung morphogenesis            | HOXA5; DAG1                                                                                                                                                   | 29   | 29             |
| 0.001806512 | 0.015080803 | GO:0048706 | b             | 5          | embryonic skeletal system development                               | HOXA5; HOXA3; HOXA9                                                                                                                                           | 126  | 126            |
| 0.001808854 | 0.015080803 | GO:0006351 | b             | 5          | transcription, DNA-templated                                        | SBNO2; GDF9; MAML2; CEBPG; ZFP90; TRIM25; TEF; FOXD1; HOXA5; HOXA3; CUL2; SATB1; PHF5A; ASCC2; HOXA9                                                          | 3645 | 3628           |
| 0.002144917 | 0.015080803 | GO:0032774 | b             | 5          | RNA biosynthetic process                                            | SBNO2; GDF9; MAML2; CEBPG; ZFP90; TRIM25; TEF; FOXD1; HOXA5; HOXA3; CUL2; SATB1; PHF5A; ASCC2; HOXA9                                                          | 3705 | 3688           |
| 0.002199284 | 0.015080803 | GO:0044409 | b             | 5          | entry into host                                                     | TRIM25; DAG1; CBLL1                                                                                                                                           | 135  | 135            |
| 0.002199284 | 0.015080803 | GO:0051806 | b             | 5          | entry into cell of other organism involved in symbiotic interaction | TRIM25; DAG1; CBLL1                                                                                                                                           | 135  | 135            |
| 0.000819781 | 0.015698692 | GO:0051171 | b             | 4          | regulation of nitrogen compound metabolic process                   | SBNO2; GDF9; MAML2; CEBPG; ZFP90; TNFSF15; TRIM25; CUL2; DOCK7; TEF; FOXD1; HOXA5; HOXA3; DAG1; SATB1; PHF5A; ASCC2; SPRED2; PRR7; HOXA9; TMED10              | 5904 | 5881           |
| 0.000944599 | 0.015698692 | GO:0034654 | b             | 4          | nucleobase-containing compound biosynthetic process                 | SBNO2; GDF9; MAML2; CEBPG; ZFP90; DLD; TRIM25; GNPDA1; TEF; FOXD1; HOXA5; HOXA3; CUL2; SATB1; PHF5A; ASCC2; HOXA9                                             | 4222 | 4204           |
| 0.001016347 | 0.015698692 | GO:0030099 | b             | 4          | myeloid cell differentiation                                        | FAM213A; SBNO2; HOXA5; CEBPG; HOXA9                                                                                                                           | 408  | 406            |
| 0.001103753 | 0.015698692 | GO:0048584 | b             | 4          | positive regulation of response to stimulus                         | GDF9; CEBPG; TNFSF15; SKAP2; TRIM25; TSPAN14; SPRED2; FOXD1; CD6; MAML2; CDH3; PRR7                                                                           | 2371 | 2366           |
| 0.001127729 | 0.015698692 | GO:0018130 | b             | 4          | heterocycle biosynthetic process                                    | SBNO2; GDF9; MAML2; CEBPG; ZFP90; DLD; TRIM25; GNPDA1; TEF; FOXD1; HOXA5; HOXA3; CUL2; SATB1; PHF5A; ASCC2; HOXA9                                             | 4285 | 4267           |
| 0.001226498 | 0.015698692 | GO:0080090 | b             | 4          | regulation of primary metabolic process                             | SBNO2; GDF9; MAML2; CEBPG; ZFP90; TNFSF15; TRIM25; CUL2; DOCK7; TEF; FOXD1; HOXA5; HOXA3; DAG1; SATB1; PHF5A; ASCC2; SPRED2; PRR7; HOXA9; TMED10              | 6071 | 6047           |
| 0.001293848 | 0.015698692 | GO:0023056 | b             | 4          | positive regulation of signaling                                    | GDF9; MAML2; TNFSF15; SKAP2; TRIM25; TSPAN14; SPRED2; FOXD1; CDH3; PRR7                                                                                       | 1748 | 1745           |
| 0.002551661 | 0.016176839 | GO:0031326 | b             | 5          | regulation of cellular biosynthetic process                         | SBNO2; GDF9; MAML2; CEBPG; ZFP90; TRIM25; TEF; FOXD1; HOXA5; HOXA3; CUL2; SATB1; PHF5A; ASCC2; CDH3; HOXA9                                                    | 4174 | 4158           |
| 0.002748029 | 0.016176839 | GO:0051252 | b             | 5          | regulation of RNA metabolic process                                 | SBNO2; GDF9; MAML2; CEBPG; ZFP90; TRIM25; TEF; FOXD1; HOXA5; HOXA3; CUL2; SATB1; PHF5A; ASCC2; HOXA9                                                          | 3795 | 3778           |
| 0.002864649 | 0.016176839 | GO:0016070 | b             | 5          | RNA metabolic process                                               | SBNO2; GDF9; MAML2; CEBPG; ZFP90; TRIM25; TEF; FOXD1; HOXA5; HOXA3; CUL2; SATB1; PHF5A; ASCC2; DUS4; HOXA9; CBLL1                                             | 4644 | 4624           |
| 0.00030609  | 0.017987405 | GO:0002520 | b             | 2          | immune system development                                           | FAM213A; SBNO2; CEBPG; PRR7; HOXA5; HOXA3; SATB1; HOXA9                                                                                                       | 928  | 925            |

|              |             |            |   |   |                                                                          |                                                                                                                                                                                                         |       |       |
|--------------|-------------|------------|---|---|--------------------------------------------------------------------------|---------------------------------------------------------------------------------------------------------------------------------------------------------------------------------------------------------|-------|-------|
| 0.000545073  | 0.017987405 | GO:0007275 | b | 2 | multicellular organism development                                       | FAM213A; SBNO2; GDF9; CEBPG; PRR7; DLD; CBLL1; UQCRQ; DOCK7; SPRED2; FOXD1; HOXA5; HOXA3; DAG1; SATB1; FNDC3A; CDH3; ACO2; HOXA9; TMED10                                                                | 5289  | 5275  |
| 0.003832631  | 0.020440698 | GO:0060986 | b | 5 | endocrine hormone secretion                                              | GDF9; FOXD1                                                                                                                                                                                             | 48    | 48    |
| 0.002199284  | 0.025016854 | GO:0051828 | b | 4 | entry into other organism involved in symbiotic interaction              | TRIM25; DAG1; CBLL1                                                                                                                                                                                     | 135   | 135   |
| 0.00055935   | 0.025382923 | GO:0010556 | b | 5 | regulation of macromolecule biosynthetic process                         | SBNO2; GDF9; MAML2; CEBPG; ZFP90; TRIM25; TEF; FOXD1; HOXA5; HOXA3; CUL2; SATB1; PHF5A; ASCC2; HOXA9                                                                                                    | 4031  | 4015  |
| 0.0005549711 | 0.025382923 | GO:0019219 | b | 5 | regulation of nucleobase-containing compound metabolic process           | SBNO2; GDF9; MAML2; CEBPG; ZFP90; TRIM25; TEF; FOXD1; HOXA5; HOXA3; CUL2; SATB1; PHF5A; ASCC2; CDH3; HOXA9                                                                                              | 4070  | 4053  |
| 0.0005552514 | 0.025382923 | GO:0010468 | b | 5 | regulation of gene expression                                            | SBNO2; GDF9; MAML2; CEBPG; ZFP90; TRIM25; TEF; FOXD1; HOXA5; HOXA3; CUL2; SATB1; PHF5A; ASCC2; CDH3; HOXA9                                                                                              | 4492  | 4475  |
| 0.001605377  | 0.025686025 | GO:0001067 | m | 4 | regulatory region nucleic acid binding                                   | CEBPG; TEF; FOXD1; HOXA5; HOXA3; SATB1; HOXA9                                                                                                                                                           | 926   | 918   |
| 0.002583307  | 0.02765658  | GO:0002521 | b | 4 | leukocyte differentiation                                                | FAM213A; SBNO2; CEBPG; SATB1; PRR7                                                                                                                                                                      | 504   | 502   |
| 0.002964535  | 0.029404686 | GO:0048754 | b | 4 | branching morphogenesis of an epithelial tube                            | HOXA5; DAG1; FOXD1                                                                                                                                                                                      | 150   | 150   |
| 0.00306972   | 0.029404686 | GO:0009889 | b | 4 | regulation of biosynthetic process                                       | SBNO2; GDF9; MAML2; CEBPG; ZFP90; TRIM25; TEF; FOXD1; HOXA5; HOXA3; CUL2; SATB1; PHF5A; ASCC2; CDH3; HOXA9                                                                                              | 4246  | 4230  |
| 0.001879509  | 0.031223159 | GO:0021700 | b | 2 | developmental maturation                                                 | CDH3; HOXA5; DAG1; DLD                                                                                                                                                                                  | 277   | 276   |
| 0.001892313  | 0.031223159 | GO:0048856 | b | 2 | anatomical structure development                                         | FAM213A; SBNO2; GDF9; CEBPG; PRR7; DLD; CBLL1; UQCRQ; DOCK7; SPRED2; FOXD1; HOXA5; HOXA3; DAG1; SATB1; FNDC3A; CDH3; ACO2; HOXA9; TMED10                                                                | 5790  | 5773  |
| 0.002777406  | 0.036661753 | GO:0044237 | b | 2 | cellular metabolic process                                               | TNFSF15; GNPDA1; TSPAN14; DOCK7; SPRED2; UQCRQ; CBLL1; ZFP90; TMED10; GDF9; CEBPG; TEF; PRR7; CDH3; CUL2; DLD; TRIM25; FOXD1; DAG1; SATB1; PHF5A; MAML2; ACO2; SBNO2; HOXA5; HOXA3; ASCC2; DUS4L; HOXA9 | 10637 | 10598 |
| 0.00106765   | 0.037436961 | GO:0006725 | b | 3 | cellular aromatic compound metabolic process                             | SBNO2; GDF9; MAML2; CEBPG; ZFP90; DLD; TRIM25; GNPDA1; TEF; FOXD1; HOXA5; HOXA3; CUL2; SATB1; PHF5A; ASCC2; CDH3; UQCRQ; DUS4L; HOXA9; CBLL1                                                            | 6015  | 5989  |
| 0.001653661  | 0.037436961 | GO:0019222 | b | 3 | regulation of metabolic process                                          | TNFSF15; DOCK7; SPRED2; ZFP90; TMED10; GDF9; MAML2; TEF; PRR7; CDH3; CUL2; TRIM25; FOXD1; DAG1; SATB1; ASCC2; CEBPG; SBNO2; HOXA5; HOXA3; PHF5A; HOXA9                                                  | 6671  | 6647  |
| 0.001726458  | 0.037436961 | GO:1901360 | b | 3 | organic cyclic compound metabolic process                                | SBNO2; GDF9; MAML2; CEBPG; ZFP90; DLD; TRIM25; GNPDA1; TEF; FOXD1; HOXA5; HOXA3; CUL2; SATB1; PHF5A; ASCC2; CDH3; UQCRQ; DUS4L; HOXA9; CBLL1                                                            | 6220  | 6194  |
| 0.001941221  | 0.037436961 | GO:0006139 | b | 3 | nucleobase-containing compound metabolic process                         | SBNO2; GDF9; MAML2; CEBPG; ZFP90; DLD; TRIM25; GNPDA1; TEF; FOXD1; HOXA5; HOXA3; CUL2; SATB1; PHF5A; ASCC2; UQCRQ; DUS4L; HOXA9; CBLL1                                                                  | 5810  | 5784  |
| 0.002769974  | 0.037436961 | GO:0046483 | b | 3 | heterocycle metabolic process                                            | SBNO2; GDF9; MAML2; CEBPG; ZFP90; DLD; TRIM25; GNPDA1; TEF; FOXD1; HOXA5; HOXA3; CUL2; SATB1; PHF5A; ASCC2; UQCRQ; DUS4L; HOXA9; CBLL1                                                                  | 5967  | 5941  |
| 0.003132233  | 0.037436961 | GO:0034641 | b | 3 | cellular nitrogen compound metabolic process                             | SBNO2; GDF9; MAML2; CEBPG; ZFP90; DLD; CBLL1; TRIM25; GNPDA1; TEF; FOXD1; HOXA5; HOXA3; CUL2; SATB1; PHF5A; ASCC2; UQCRQ; DUS4L; HOXA9; TMED10                                                          | 6494  | 6465  |
| 0.003434225  | 0.037436961 | GO:0048731 | b | 3 | system development                                                       | FAM213A; SBNO2; GDF9; CEBPG; PRR7; UQCRQ; DOCK7; FOXD1; HOXA5; HOXA3; DAG1; SATB1; FNDC3A; CDH3; ACO2; HOXA9; TMED10                                                                                    | 4713  | 4699  |
| 0.003555327  | 0.037436961 | GO:0071695 | b | 3 | anatomical structure maturation                                          | CDH3; HOXA5; DAG1                                                                                                                                                                                       | 161   | 160   |
| 0.003993068  | 0.037436961 | GO:0048519 | b | 3 | negative regulation of biological process                                | SBNO2; GDF9; CEBPG; ZFP90; SKAP2; TRIM25; CUL2; DOCK7; SPRED2; FOXD1; HOXA5; HOXA3; DAG1; SATB1; CDH3; PRR7; HOXA9; CBLL1                                                                               | 5219  | 5201  |
| 0.004066625  | 0.037436961 | GO:0003002 | b | 3 | regionalization                                                          | HOXA5; HOXA3; HOXA9; FOXD1                                                                                                                                                                              | 342   | 342   |
| 0.004124411  | 0.037436961 | GO:0050794 | b | 3 | regulation of cellular process                                           | FAM213A; TNFSF15; SKAP2; TSPAN14; DOCK7; SPRED2; CD6; CBLL1; ZFP90; PHF5A; TMED10; GDF9; CEBPG; TEF; PRR7; CDH3; CUL2; DLD; TRIM25; FOXD1; DAG1; SATB1; LMAN2; MAML2; SBNO2; HOXA5; HOXA3; ASCC2; HOXA9 | 10850 | 10810 |
| 0.004152182  | 0.037784855 | GO:0060425 | b | 4 | lung morphogenesis                                                       | HOXA5; DAG1                                                                                                                                                                                             | 50    | 50    |
| 0.00454742   | 0.038328257 | GO:0048598 | b | 3 | embryonic morphogenesis                                                  | HOXA5; HOXA3; DAG1; HOXA9; DLD                                                                                                                                                                          | 573   | 573   |
| 0.005095331  | 0.040083267 | GO:0061138 | b | 3 | morphogenesis of a branching epithelium                                  | HOXA5; DAG1; FOXD1                                                                                                                                                                                      | 182   | 182   |
| 0.008909262  | 0.041948808 | GO:0061659 | m | 4 | ubiquitin-like protein ligase activity                                   | TRIM25; CBLL1; CUL2                                                                                                                                                                                     | 223   | 223   |
| 0.010084844  | 0.041948808 | GO:0050660 | m | 4 | flavin adenine dinucleotide binding                                      | DUS4L; DLD                                                                                                                                                                                              | 79    | 79    |
| 0.010487202  | 0.041948808 | GO:0001228 | m | 4 | DNA-binding transcription activator activity, RNA polymerase II-specific | HOXA5; CEBPG; TEF; FOXD1                                                                                                                                                                                | 457   | 449   |
| 0.004865275  | 0.04216572  | GO:0045333 | b | 4 | cellular respiration                                                     | UQCRQ; ACO2; DLD                                                                                                                                                                                        | 179   | 179   |
| 0.005907531  | 0.043568041 | GO:0030154 | b | 3 | cell differentiation                                                     | FAM213A; SBNO2; GDF9; CEBPG; DLD; UQCRQ; DOCK7; FOXD1; HOXA5; DAG1; SATB1; FNDC3A; CDH3; PRR7; HOXA9                                                                                                    | 4089  | 4079  |
| 0.005277872  | 0.0436624   | GO:0044271 | b | 4 | cellular nitrogen compound biosynthetic process                          | SBNO2; GDF9; MAML2; CEBPG; ZFP90; DLD; TRIM25; GNPDA1; TEF; FOXD1; HOXA5; HOXA3; CUL2; SATB1; PHF5A; ASCC2; HOXA9                                                                                       | 4906  | 4885  |
| 0.004715482  | 0.045873485 | GO:0009566 | b | 2 | fertilization                                                            | FNDC3A; GNPDA1; HOXA9                                                                                                                                                                                   | 177   | 177   |
| 0.005064104  | 0.045873485 | GO:0001775 | b | 2 | cell activation                                                          | SBNO2; CEBPG; SKAP2; TSPAN14; PRR7; CD6; SATB1; HOXA9                                                                                                                                                   | 1435  | 1432  |
| 0.005661678  | 0.045873485 | GO:0071704 | b | 2 | organic substance metabolic process                                      | TNFSF15; GNPDA1; TSPAN14; DOCK7; SPRED2; UQCRQ; CBLL1; ZFP90; TMED10; GDF9; CEBPG; TEF; PRR7; CDH3; CUL2; DLD; TRIM25; FOXD1; DAG1; SATB1; PHF5A; MAML2; ACO2; SBNO2; HOXA5; HOXA3; ASCC2; DUS4L; HOXA9 | 11025 | 10986 |
| 0.006255475  | 0.045873485 | GO:0001763 | b | 2 | morphogenesis of a branching structure                                   | HOXA5; DAG1; FOXD1                                                                                                                                                                                      | 196   | 196   |
| 0.008218434  | 0.04730617  | GO:0044238 | b | 2 | primary metabolic process                                                | TNFSF15; GNPDA1; TSPAN14; DOCK7; SPRED2; UQCRQ; CBLL1; ZFP90; TMED10; GDF9; CEBPG; TEF; PRR7; CUL2; DLD; TRIM25; FOXD1; DAG1; SATB1; PHF5A; MAML2; ACO2; SBNO2; HOXA5; HOXA3; ASCC2; DUS4L; HOXA9       | 10663 | 10624 |
| 0.009067287  | 0.04730617  | GO:0048869 | b | 2 | cellular developmental process                                           | FAM213A; SBNO2; GDF9; CEBPG; DLD; UQCRQ; DOCK7; FOXD1; HOXA5; DAG1; SATB1; FNDC3A; CDH3; PRR7; HOXA9                                                                                                    | 4275  | 4265  |
| 0.009312077  | 0.04730617  | GO:0006807 | b | 2 | nitrogen compound metabolic process                                      | TNFSF15; GNPDA1; TSPAN14; DOCK7; SPRED2; UQCRQ; CBLL1; ZFP90; TMED10; GDF9; MAML2; TEF; PRR7; CUL2; DLD; TRIM25; FOXD1; DAG1; SATB1; PHF5A; CEBPG; SBNO2; HOXA5; HOXA3; ASCC2; DUS4L; HOXA9             | 10174 | 10136 |
| 0.009486926  | 0.04730617  | GO:0007389 | b | 2 | pattern specification process                                            | HOXA5; HOXA3; HOXA9; FOXD1                                                                                                                                                                              | 436   | 436   |
| 0.010034642  | 0.04730617  | GO:0045321 | b | 2 | leukocyte activation                                                     | SBNO2; CEBPG; SKAP2; TSPAN14; PRR7; CD6; SATB1                                                                                                                                                          | 1284  | 1281  |

|             |             |            |   |   |                                            |                                                                                                                                                                                    |      |      |
|-------------|-------------|------------|---|---|--------------------------------------------|------------------------------------------------------------------------------------------------------------------------------------------------------------------------------------|------|------|
| 0.00686863  | 0.047676371 | GO:0043170 | b | 3 | macromolecule metabolic process            | TNFSF15; TSPAN14; DOCK7; SPRED2; CBLL1; ZFP90; TMED10; GDF9; MAML2; TEF; PRR7; CDH3; CUL2; DLD; TRIM25; FOXD1; DAG1; SATB1; PHF5A; CEBPG; SBNO2; HOXA5; HOXA3; ASCC2; DUS4L; HOXA9 | 9445 | 9411 |
| 0.011747399 | 0.049517199 | GO:0045637 | b | 5 | regulation of myeloid cell differentiation | FAM213A; HOXA5; HOXA9                                                                                                                                                              | 249  | 247  |
| 0.011863495 | 0.049517199 | GO:0042773 | b | 5 | ATP synthesis coupled electron transport   | UQCRQ; DLD                                                                                                                                                                         | 86   | 86   |
| 0.007561727 | 0.049571324 | GO:0051701 | b | 3 | interaction with host                      | TRIM25; DAG1; CBLL1                                                                                                                                                                | 210  | 210  |
| 0.002153244 | 0.049786788 | GO:0034399 | c | 4 | nuclear periphery                          | PHF5A; DAG1; SATB1                                                                                                                                                                 | 134  | 134  |
| 0.003829753 | 0.049786788 | GO:0005654 | c | 4 | nucleoplasm                                | MAML2; CEBPG; DLD; SKAP2; TRIM25; COG5; HOXA3; DAG1; SATB1; PHF5A; ASCC2; SPATA7; CUL2; CBLL1                                                                                      | 3520 | 3501 |
